# Supplementary material
Source: PubMed Central journal article supplement (PMC7015322)
Supplement: rspb20192705supp1.pdf [file rspb20192705supp1.pdf]

## SUPPLEMENTARY MATERIAL

Predaceous *Toxorhynchites* mosquitoes require a living gut microbiota to develop

Kerri L. Coon<sup>1\*</sup>, Luca Valzania<sup>2</sup>, Mark R. Brown<sup>2</sup>, and Michael R. Strand<sup>2</sup>

<sup>1</sup>Department of Entomology, University of Wisconsin-Madison, Madison, WI, 53706 USA

<sup>2</sup>Department of Entomology, The University of Georgia, Athens, GA, 30602 USA

\*Corresponding author: Kerri L. Coon, [kerri.coon@wisc.edu](mailto:kerri.coon@wisc.edu)

Journal: *Proceedings B*

doi:10.1098/rspb.2019.2705

## Supplementary Methods

### *Surface sterilization of eggs*

Axenic larvae were produced by placing eggs into sterile Petri dishes containing 70% EtOH for 5 min, transferring to a solution of 3% bleach and 0.1% ROCCAL-D (Pfizer) for 3 min, transferring again to 70% EtOH for 5 min, and rinsing 3x in sterile water. Sterile water was produced by autoclaving.

### *Verification of sterility of axenic larvae*

Sterility of axenic *Toxorhynchites amboinensis* and *Aedes aegypti* prey larvae was confirmed by culture-based and PCR analysis. For *A. aegypti*, a pool of 30 first instars from surface sterilized eggs was rinsed in sterile water and transferred to 100  $\mu$ l of sterile PBS and homogenized. Larval homogenates were plated on Luria broth (LB) and brain-heart infusion (BHI) agar plates at 28° C for 24-72 h and subsequently checked for colonies. DNA was also isolated from ten pools of 10 larvae using the Genra Puregene Yeast/Bacteria Kit (Qiagen). Following DNA extraction, the 16S rDNA gene was amplified using the universal bacterial primers 27F (5'- GAGAGTTTGATCCTGGCTCAG-3') and 1492R (5'- GGTTACCTTGTTACGACTT-3') and 5  $\mu$ l of the resulting PCR products was electrophoresed on a 1% (wt/vol) agarose gel. The same analyses were performed with *T. amboinensis* larvae, with a pool of 10 first instars being processed for culture-based analysis and 10 individual larvae being processed for PCR analysis.

### *Detection of bacterial isolates in gnotobiotic larvae*

The presence or absence of *Comamonas* or *E. coli* in gnotobiotic *T. amboinensis* and *A. aegypti* prey larvae was also determined using culture-based and PCR analysis. For culture-based analyses, ten individual *T. amboinensis* or *A. aegypti* fourth instars were collected randomly from replicate rearing dishes or plates and subsequently homogenized and plated as described above. Plates were then checked for viable colonies and ten individual colonies were screened via colony PCR using either *Comamonas*-specific primers Coma-qF (5'-GAGTCGAAAATCAGCGTTGC-3') and Coma-qR (5'-GCACAAGAACCCAAGCAACT-3') or *E. coli*-specific primers Tecol754 (5'-CAGTACAGGTAGACTTCTG-3') and Tecol553 (5'-TGGGAAGCGAAAATCCTG-3'). DNA from ten individual fourth instars collected from the same rearing dishes or plates was also used as template in PCR reactions containing the same taxon-specific primers.

### *PCR amplification conditions*

For all PCR analyses, 10  $\mu$ l reactions were conducted, each containing 1 X HotMaster Taq Buffer, 200  $\mu$ M of each dNTP, 0.2  $\mu$ M of each primer, 1 U of Hotmaster Taq polymerase (5 Prime) and 0.8  $\mu$ l of DNA template. Reactions were run on an MJ Mini thermocycler (Bio-Rad) with amplification cycle conditions as follows: denaturation at 94° C for 2 min, followed by 30 cycles of 94° C for 20 s, ( $T_a$ )° C for 20 s, and 65° C for 1 min, and final extension at 65° C for 5 min. The annealing temperature ( $T_a$ ) used for each primer set was as follows: 27F/1492R (50° C), Coma-qF/Coma-qR (55° C), and Tecol754/Tecol553 (58° C).

## Supplementary Tables and Figures

**Supplementary Table 1.** [See Pages 4-13]

**Table S1.** Prevalence of each OTU (99% sequence similarity) in each sample

| OTU ID | tox1 | tox2 | tox3 | tox4 | tox5 | tox6 | aegypti1 | aegypti2 | aegypti3 | aegypti4 | aegypti5 | aegypti6 | water1 | water2 | water3 | water4 | water5 | water6 |
|--------|------|------|------|------|------|------|----------|----------|----------|----------|----------|----------|--------|--------|--------|--------|--------|--------|
| 818    | 44   | 2    | 348  | 2    | 368  | 2    | 211      | 2        | 131      | 0        | 718      | 2        | 0      | 0      | 0      | 2050   | 1283   | 2062   |
| 0      | 5151 | 8820 | 7440 | 3457 | 6259 | 5604 | 11798    | 6998     | 8962     | 8434     | 12545    | 5793     | 1464   | 1407   | 613    | 383    | 139    | 577    |
| 346    | 0    | 8    | 5    | 0    | 3    | 6    | 0        | 0        | 0        | 0        | 5        | 7        | 0      | 0      | 0      | 0      | 0      | 0      |
| 347    | 0    | 0    | 0    | 0    | 0    | 0    | 0        | 0        | 0        | 0        | 0        | 0        | 3      | 1      | 11     | 4      | 15     | 1      |
| 340    | 3    | 34   | 57   | 52   | 47   | 1    | 163      | 361      | 73       | 124      | 35       | 38       | 40     | 12     | 79     | 11     | 7      | 3      |
| 341    | 0    | 9    | 6    | 1    | 1    | 0    | 2        | 6        | 2        | 0        | 3        | 1        | 0      | 0      | 0      | 0      | 0      | 0      |
| 342    | 0    | 6    | 4    | 1    | 4    | 0    | 3        | 13       | 2        | 6        | 5        | 2        | 2      | 1      | 3      | 0      | 0      | 0      |
| 343    | 0    | 5    | 0    | 2    | 0    | 2    | 1        | 7        | 0        | 4        | 0        | 3        | 8      | 15     | 2      | 0      | 0      | 0      |
| 348    | 5    | 1    | 2    | 2    | 2    | 1    | 12       | 2        | 10       | 2        | 2        | 0        | 118    | 93     | 40     | 116    | 58     | 121    |
| 816    | 0    | 0    | 2    | 0    | 4    | 0    | 1        | 1        | 1        | 0        | 0        | 1        | 6      | 1      | 11     | 2      | 1      | 1      |
| 817    | 0    | 64   | 0    | 6    | 0    | 30   | 0        | 26       | 0        | 17       | 0        | 20       | 1020   | 835    | 334    | 0      | 0      | 0      |
| 1149   | 0    | 0    | 0    | 0    | 0    | 0    | 0        | 0        | 0        | 0        | 0        | 0        | 4      | 0      | 20     | 4      | 20     | 0      |
| 711    | 0    | 0    | 0    | 0    | 0    | 0    | 0        | 0        | 0        | 0        | 0        | 0        | 15     | 6      | 21     | 0      | 0      | 0      |
| 424    | 0    | 0    | 0    | 0    | 0    | 0    | 0        | 0        | 0        | 0        | 0        | 0        | 5      | 4      | 29     | 13     | 26     | 2      |
| 298    | 0    | 0    | 0    | 0    | 0    | 0    | 0        | 0        | 0        | 0        | 0        | 0        | 0      | 0      | 0      | 22     | 48     | 6      |
| 299    | 0    | 1    | 0    | 0    | 0    | 0    | 0        | 0        | 0        | 0        | 0        | 0        | 14     | 3      | 29     | 0      | 3      | 0      |
| 296    | 0    | 0    | 0    | 0    | 0    | 0    | 0        | 0        | 0        | 0        | 0        | 0        | 6      | 2      | 9      | 7      | 11     | 9      |
| 297    | 0    | 0    | 0    | 0    | 0    | 0    | 0        | 0        | 0        | 0        | 0        | 0        | 3      | 0      | 13     | 3      | 13     | 0      |
| 292    | 0    | 0    | 4    | 0    | 1    | 0    | 4        | 1        | 1        | 0        | 3        | 0        | 3      | 4      | 0      | 13     | 7      | 18     |
| 293    | 0    | 0    | 0    | 0    | 0    | 0    | 0        | 0        | 0        | 0        | 0        | 0        | 4      | 5      | 25     | 0      | 0      | 0      |
| 290    | 0    | 0    | 0    | 0    | 0    | 0    | 0        | 0        | 0        | 0        | 0        | 0        | 12     | 4      | 18     | 0      | 0      | 0      |
| 291    | 0    | 11   | 7    | 0    | 5    | 0    | 2        | 3        | 0        | 5        | 3        | 7        | 1      | 0      | 2      | 0      | 0      | 0      |
| 1129   | 0    | 1    | 4    | 2    | 5    | 0    | 3        | 7        | 5        | 1        | 7        | 2        | 7      | 0      | 38     | 12     | 22     | 4      |
| 199    | 0    | 0    | 0    | 0    | 0    | 0    | 0        | 0        | 0        | 0        | 1        | 0        | 0      | 0      | 0      | 18     | 19     | 6      |
| 198    | 0    | 0    | 0    | 0    | 0    | 0    | 0        | 1        | 0        | 0        | 0        | 0        | 17     | 14     | 31     | 1      | 2      | 1      |
| 195    | 0    | 1    | 4    | 1    | 4    | 0    | 2        | 1        | 2        | 5        | 3        | 0        | 5      | 1      | 8      | 5      | 7      | 2      |
| 196    | 1    | 0    | 3    | 7    | 0    | 0    | 30       | 72       | 8        | 32       | 1        | 0        | 0      | 0      | 0      | 0      | 0      | 0      |
| 190    | 0    | 0    | 0    | 0    | 1    | 0    | 0        | 0        | 0        | 0        | 0        | 0        | 0      | 0      | 0      | 17     | 39     | 3      |
| 1126   | 0    | 12   | 5    | 0    | 4    | 1    | 4        | 12       | 2        | 1        | 4        | 8        | 0      | 0      | 0      | 0      | 0      | 0      |
| 270    | 0    | 4    | 4    | 0    | 6    | 0    | 5        | 3        | 2        | 0        | 4        | 3        | 0      | 0      | 0      | 0      | 0      | 0      |
| 271    | 0    | 0    | 0    | 0    | 0    | 0    | 0        | 5        | 1        | 1        | 1        | 4        | 14     | 3      | 25     | 0      | 0      | 0      |
| 272    | 0    | 0    | 28   | 0    | 21   | 0    | 6        | 0        | 1        | 0        | 16       | 0        | 0      | 0      | 0      | 6      | 16     | 4      |
| 273    | 0    | 2    | 0    | 1    | 0    | 0    | 0        | 0        | 0        | 1        | 0        | 0        | 21     | 18     | 6      | 0      | 0      | 0      |
| 274    | 0    | 0    | 0    | 0    | 0    | 0    | 0        | 0        | 0        | 0        | 0        | 0        | 3      | 2      | 25     | 7      | 18     | 6      |
| 277    | 0    | 0    | 0    | 0    | 1    | 0    | 0        | 0        | 0        | 0        | 0        | 0        | 0      | 0      | 1      | 16     | 8      | 5      |
| 194    | 0    | 0    | 0    | 0    | 0    | 0    | 0        | 0        | 0        | 0        | 0        | 0        | 13     | 2      | 59     | 20     | 29     | 11     |
| 279    | 0    | 0    | 0    | 1    | 0    | 0    | 0        | 2        | 0        | 0        | 0        | 1        | 10     | 1      | 23     | 0      | 0      | 0      |
| 738    | 0    | 0    | 0    | 0    | 1    | 0    | 1        | 1        | 1        | 0        | 0        | 1        | 14     | 1      | 27     | 1      | 0      | 0      |
| 497    | 0    | 0    | 1    | 1    | 0    | 0    | 1        | 21       | 1        | 6        | 1        | 1        | 0      | 0      | 0      | 0      | 0      | 0      |
| 525    | 0    | 0    | 1    | 0    | 0    | 0    | 0        | 0        | 0        | 0        | 0        | 0        | 11     | 0      | 25     | 4      | 10     | 2      |
| 500    | 0    | 0    | 0    | 0    | 0    | 0    | 0        | 0        | 0        | 0        | 0        | 0        | 11     | 1      | 24     | 0      | 0      | 0      |
| 522    | 0    | 20   | 4    | 0    | 6    | 1    | 0        | 24       | 1        | 3        | 3        | 20       | 3      | 0      | 2      | 0      | 0      | 0      |
| 1014   | 0    | 3    | 5    | 1    | 5    | 0    | 4        | 9        | 2        | 4        | 3        | 4        | 0      | 0      | 0      | 0      | 0      | 0      |
| 1016   | 358  | 80   | 176  | 314  | 180  | 51   | 1136     | 1274     | 679      | 767      | 331      | 40       | 28     | 21     | 13     | 5      | 5      | 7      |
| 1017   | 0    | 12   | 0    | 0    | 1    | 2    | 0        | 3        | 0        | 1        | 0        | 20       | 0      | 0      | 0      | 0      | 1      | 0      |
| 529    | 0    | 0    | 1    | 0    | 1    | 0    | 0        | 1        | 0        | 0        | 0        | 0        | 6      | 0      | 11     | 8      | 8      | 5      |
| 449    | 0    | 0    | 0    | 0    | 0    | 1    | 1        | 0        | 0        | 1        | 0        | 0        | 35     | 32     | 20     | 4      | 1      | 16     |
| 443    | 0    | 0    | 0    | 0    | 0    | 0    | 1        | 1        | 1        | 1        | 0        | 4        | 11     | 7      | 0      | 1      | 2      | 5      |
| 440    | 2    | 20   | 33   | 4    | 54   | 0    | 10       | 37       | 12       | 4        | 26       | 23       | 2      | 0      | 1      | 0      | 1      | 0      |

| OTU ID | tox1 | tox2 | tox3 | tox4 | tox5 | tox6 | aegypti1 | aegypti2 | aegypti3 | aegypti4 | aegypti5 | aegypti6 | water1 | water2 | water3 | water4 | water5 | water6 |
|--------|------|------|------|------|------|------|----------|----------|----------|----------|----------|----------|--------|--------|--------|--------|--------|--------|
| 447    | 0    | 14   | 1    | 2    | 6    | 1    | 1        | 3        | 2        | 3        | 1        | 8        | 10     | 5      | 24     | 2      | 0      | 1      |
| 108    | 0    | 0    | 0    | 0    | 1    | 0    | 0        | 0        | 0        | 0        | 0        | 0        | 0      | 0      | 0      | 15     | 51     | 8      |
| 109    | 0    | 0    | 3    | 0    | 8    | 0    | 6        | 0        | 0        | 0        | 6        | 0        | 0      | 0      | 0      | 33     | 46     | 17     |
| 102    | 1    | 3    | 3    | 4    | 3    | 4    | 1        | 7        | 2        | 11       | 4        | 0        | 28     | 33     | 18     | 16     | 10     | 25     |
| 103    | 1    | 5    | 18   | 17   | 21   | 0    | 31       | 95       | 14       | 25       | 15       | 1        | 1      | 0      | 1      | 0      | 0      | 0      |
| 100    | 0    | 0    | 0    | 0    | 0    | 0    | 0        | 2        | 0        | 0        | 0        | 0        | 25     | 10     | 77     | 7      | 12     | 2      |
| 101    | 1    | 17   | 18   | 2    | 9    | 1    | 10       | 22       | 2        | 2        | 13       | 14       | 0      | 0      | 1      | 0      | 0      | 0      |
| 106    | 0    | 0    | 1    | 0    | 1    | 0    | 0        | 0        | 0        | 0        | 1        | 0        | 0      | 0      | 0      | 35     | 61     | 18     |
| 107    | 0    | 24   | 5    | 3    | 4    | 0    | 0        | 7        | 1        | 4        | 3        | 23       | 26     | 8      | 70     | 4      | 13     | 0      |
| 104    | 6    | 4    | 12   | 1    | 3    | 0    | 8        | 4        | 9        | 6        | 16       | 3        | 118    | 112    | 67     | 109    | 52     | 129    |
| 105    | 0    | 0    | 19   | 0    | 38   | 0    | 14       | 0        | 5        | 0        | 32       | 0        | 0      | 0      | 1      | 8      | 6      | 6      |
| 903    | 0    | 20   | 1    | 10   | 0    | 13   | 0        | 22       | 1        | 15       | 0        | 22       | 3      | 2      | 0      | 0      | 0      | 0      |
| 39     | 0    | 117  | 0    | 123  | 0    | 119  | 0        | 183      | 0        | 234      | 0        | 45       | 7      | 1      | 0      | 0      | 0      | 0      |
| 38     | 22   | 9    | 12   | 21   | 13   | 6    | 108      | 48       | 69       | 37       | 32       | 5        | 54     | 43     | 21     | 151    | 45     | 132    |
| 33     | 9    | 106  | 0    | 84   | 1    | 62   | 23       | 183      | 14       | 185      | 3        | 48       | 109    | 102    | 24     | 34     | 7      | 45     |
| 32     | 5    | 189  | 43   | 90   | 30   | 176  | 58       | 175      | 27       | 250      | 86       | 157      | 20     | 20     | 8      | 10     | 1      | 8      |
| 31     | 11   | 199  | 18   | 43   | 14   | 135  | 51       | 99       | 35       | 131      | 40       | 80       | 56     | 39     | 12     | 80     | 17     | 35     |
| 30     | 8    | 16   | 15   | 13   | 14   | 16   | 19       | 35       | 22       | 29       | 54       | 5        | 177    | 126    | 24     | 284    | 66     | 336    |
| 37     | 3    | 224  | 3    | 52   | 7    | 135  | 6        | 122      | 7        | 123      | 8        | 139      | 32     | 33     | 8      | 1      | 0      | 3      |
| 36     | 3    | 6    | 10   | 0    | 6    | 2    | 12       | 4        | 8        | 4        | 29       | 4        | 172    | 203    | 52     | 187    | 74     | 296    |
| 35     | 20   | 65   | 60   | 22   | 67   | 28   | 89       | 52       | 65       | 35       | 108      | 17       | 3      | 3      | 1      | 6      | 7      | 13     |
| 34     | 0    | 193  | 0    | 125  | 4    | 110  | 0        | 264      | 2        | 240      | 8        | 105      | 67     | 55     | 31     | 1      | 0      | 1      |
| 433    | 1    | 2    | 6    | 1    | 1    | 2    | 9        | 11       | 3        | 3        | 5        | 5        | 385    | 235    | 94     | 38     | 19     | 27     |
| 338    | 0    | 0    | 0    | 1    | 0    | 0    | 0        | 1        | 0        | 0        | 0        | 0        | 10     | 0      | 20     | 0      | 0      | 0      |
| 335    | 0    | 3    | 2    | 1    | 5    | 0    | 17       | 30       | 2        | 6        | 6        | 1        | 0      | 0      | 0      | 0      | 0      | 0      |
| 337    | 0    | 0    | 2    | 0    | 0    | 0    | 1        | 1        | 0        | 0        | 0        | 0        | 7      | 1      | 30     | 2      | 4      | 1      |
| 336    | 0    | 1    | 6    | 0    | 5    | 0    | 1        | 4        | 1        | 0        | 5        | 0        | 1      | 2      | 8      | 0      | 0      | 0      |
| 333    | 10   | 237  | 29   | 44   | 25   | 177  | 41       | 73       | 19       | 86       | 67       | 98       | 1086   | 1023   | 355    | 432    | 166    | 405    |
| 332    | 0    | 0    | 0    | 1    | 0    | 0    | 5        | 15       | 1        | 5        | 0        | 0        | 1      | 1      | 7      | 3      | 2      | 0      |
| 852    | 0    | 6    | 2    | 3    | 3    | 0    | 1        | 14       | 1        | 0        | 2        | 4        | 0      | 0      | 2      | 0      | 0      | 0      |
| 345    | 0    | 1    | 0    | 0    | 3    | 0    | 1        | 0        | 2        | 0        | 6        | 0        | 5      | 11     | 0      | 4      | 3      | 10     |
| 193    | 0    | 0    | 0    | 6    | 1    | 0    | 5        | 45       | 1        | 5        | 0        | 0        | 0      | 0      | 0      | 0      | 0      | 0      |
| 6      | 333  | 1548 | 1359 | 396  | 1163 | 932  | 1356     | 946      | 1066     | 922      | 2683     | 766      | 218    | 193    | 48     | 122    | 39     | 193    |
| 99     | 0    | 28   | 9    | 0    | 16   | 6    | 1        | 0        | 5        | 0        | 28       | 14       | 0      | 0      | 0      | 0      | 0      | 0      |
| 98     | 0    | 0    | 0    | 10   | 0    | 0    | 50       | 62       | 12       | 23       | 1        | 0        | 0      | 0      | 1      | 0      | 0      | 0      |
| 91     | 5    | 26   | 7    | 13   | 11   | 17   | 20       | 25       | 25       | 22       | 24       | 4        | 466    | 490    | 303    | 660    | 382    | 790    |
| 90     | 0    | 0    | 0    | 0    | 1    | 0    | 0        | 1        | 1        | 0        | 0        | 0        | 9      | 7      | 18     | 3      | 8      | 1      |
| 93     | 3    | 3    | 0    | 19   | 0    | 2    | 7        | 44       | 4        | 55       | 0        | 0        | 20     | 17     | 4      | 16     | 3      | 19     |
| 92     | 0    | 0    | 47   | 0    | 35   | 0    | 18       | 0        | 1        | 0        | 31       | 0        | 0      | 0      | 0      | 11     | 18     | 3      |
| 95     | 1    | 0    | 22   | 0    | 43   | 0    | 5        | 0        | 2        | 0        | 22       | 0        | 0      | 0      | 0      | 9      | 11     | 3      |
| 94     | 1    | 4    | 10   | 0    | 12   | 1    | 4        | 0        | 4        | 2        | 37       | 0        | 4      | 8      | 4      | 66     | 16     | 40     |
| 97     | 0    | 37   | 19   | 2    | 17   | 0    | 9        | 20       | 5        | 5        | 15       | 22       | 2      | 1      | 2      | 0      | 0      | 0      |
| 96     | 1    | 5    | 1    | 1    | 0    | 0    | 8        | 10       | 2        | 3        | 2        | 1        | 26     | 27     | 20     | 36     | 9      | 53     |
| 349    | 0    | 0    | 0    | 0    | 0    | 0    | 0        | 1        | 0        | 1        | 0        | 0        | 21     | 18     | 7      | 0      | 0      | 0      |
| 740    | 0    | 28   | 8    | 4    | 5    | 0    | 0        | 31       | 3        | 2        | 2        | 29       | 3      | 0      | 11     | 0      | 0      | 0      |
| 551    | 0    | 5    | 5    | 2    | 2    | 9    | 5        | 5        | 2        | 1        | 8        | 2        | 9      | 5      | 0      | 6      | 0      | 1      |
| 238    | 0    | 0    | 0    | 0    | 0    | 0    | 0        | 0        | 0        | 0        | 0        | 0        | 16     | 15     | 10     | 4      | 1      | 2      |
| 234    | 3    | 0    | 1    | 3    | 2    | 0    | 10       | 2        | 4        | 4        | 4        | 0        | 4      | 1      | 2      | 12     | 5      | 12     |
| 236    | 0    | 19   | 0    | 3    | 0    | 18   | 7        | 4        | 0        | 6        | 0        | 9        | 5      | 1      | 0      | 0      | 0      | 0      |
| 237    | 4    | 3    | 22   | 4    | 23   | 1    | 14       | 13       | 10       | 9        | 37       | 7        | 228    | 211    | 133    | 150    | 68     | 194    |

| OTU ID | tox1 | tox2 | tox3 | tox4 | tox5 | tox6 | aegypti1 | aegypti2 | aegypti3 | aegypti4 | aegypti5 | aegypti6 | water1 | water2 | water3 | water4 | water5 | water6 |
|--------|------|------|------|------|------|------|----------|----------|----------|----------|----------|----------|--------|--------|--------|--------|--------|--------|
| 230    | 0    | 1    | 0    | 1    | 0    | 0    | 0        | 2        | 0        | 0        | 1        | 1        | 12     | 4      | 24     | 0      | 0      | 0      |
| 232    | 0    | 4    | 0    | 0    | 0    | 0    | 0        | 1        | 0        | 0        | 0        | 5        | 6      | 1      | 16     | 0      | 0      | 0      |
| 1      | 103  | 160  | 105  | 164  | 96   | 121  | 430      | 376      | 331      | 370      | 195      | 89       | 4813   | 4664   | 3122   | 5915   | 3128   | 7573   |
| 155    | 13   | 56   | 14   | 36   | 15   | 40   | 40       | 102      | 31       | 83       | 50       | 35       | 19     | 12     | 3      | 1      | 1      | 4      |
| 146    | 0    | 0    | 1    | 1    | 3    | 0    | 0        | 4        | 0        | 1        | 1        | 0        | 14     | 5      | 29     | 2      | 2      | 0      |
| 147    | 0    | 9    | 6    | 0    | 6    | 2    | 3        | 2        | 1        | 0        | 6        | 4        | 0      | 0      | 0      | 0      | 0      | 0      |
| 144    | 1    | 36   | 1    | 1    | 0    | 32   | 1        | 2        | 3        | 2        | 2        | 13       | 1      | 2      | 0      | 5      | 0      | 8      |
| 142    | 0    | 2    | 0    | 3    | 0    | 0    | 1        | 4        | 3        | 7        | 0        | 0        | 27     | 31     | 7      | 13     | 7      | 18     |
| 143    | 7    | 5    | 5    | 0    | 12   | 2    | 13       | 6        | 2        | 1        | 21       | 1        | 15     | 8      | 3      | 2      | 1      | 3      |
| 140    | 0    | 0    | 0    | 0    | 0    | 0    | 0        | 0        | 0        | 0        | 0        | 0        | 8      | 1      | 36     | 4      | 23     | 1      |
| 141    | 0    | 10   | 5    | 0    | 4    | 0    | 13       | 8        | 4        | 3        | 4        | 10       | 14     | 0      | 22     | 7      | 7      | 2      |
| 610    | 0    | 0    | 16   | 0    | 24   | 0    | 2        | 0        | 0        | 0        | 16       | 1        | 0      | 0      | 0      | 3      | 3      | 6      |
| 611    | 0    | 0    | 0    | 0    | 0    | 0    | 0        | 0        | 0        | 0        | 0        | 0        | 5      | 2      | 12     | 9      | 26     | 8      |
| 1179   | 2    | 9    | 10   | 2    | 6    | 1    | 3        | 7        | 6        | 7        | 10       | 1        | 33     | 27     | 40     | 29     | 18     | 21     |
| 615    | 0    | 1    | 1    | 3    | 2    | 0    | 6        | 11       | 2        | 2        | 0        | 2        | 1      | 0      | 1      | 0      | 0      | 0      |
| 1004   | 0    | 11   | 2    | 1    | 1    | 0    | 0        | 13       | 0        | 1        | 0        | 7        | 1      | 0      | 3      | 0      | 0      | 0      |
| 949    | 0    | 0    | 2    | 0    | 1    | 0    | 1        | 0        | 0        | 0        | 2        | 1        | 37     | 16     | 74     | 27     | 37     | 18     |
| 515    | 0    | 1    | 0    | 1    | 2    | 0    | 0        | 1        | 1        | 0        | 0        | 1        | 15     | 35     | 9      | 0      | 1      | 3      |
| 944    | 1586 | 3426 | 2819 | 1180 | 2770 | 2355 | 4867     | 2886     | 3484     | 3082     | 5211     | 2281     | 529    | 555    | 276    | 150    | 55     | 167    |
| 157    | 0    | 0    | 0    | 0    | 0    | 0    | 0        | 0        | 0        | 0        | 0        | 0        | 4      | 3      | 11     | 8      | 9      | 5      |
| 685    | 0    | 1    | 0    | 0    | 0    | 0    | 0        | 1        | 0        | 0        | 0        | 0        | 8      | 2      | 21     | 0      | 0      | 0      |
| 458    | 0    | 2    | 0    | 0    | 2    | 3    | 4        | 1        | 1        | 2        | 2        | 3        | 10     | 11     | 5      | 13     | 4      | 14     |
| 133    | 0    | 0    | 0    | 0    | 0    | 0    | 0        | 0        | 0        | 0        | 0        | 0        | 6      | 0      | 14     | 5      | 28     | 2      |
| 132    | 0    | 0    | 0    | 5    | 0    | 0    | 8        | 48       | 3        | 4        | 0        | 0        | 1      | 0      | 1      | 3      | 1      | 2      |
| 131    | 0    | 0    | 0    | 0    | 0    | 0    | 0        | 0        | 0        | 0        | 0        | 0        | 14     | 3      | 27     | 15     | 16     | 15     |
| 130    | 0    | 0    | 0    | 0    | 0    | 0    | 0        | 0        | 0        | 0        | 0        | 1        | 40     | 29     | 7      | 0      | 0      | 0      |
| 137    | 0    | 2    | 3    | 0    | 1    | 0    | 2        | 7        | 0        | 0        | 1        | 2        | 13     | 2      | 36     | 0      | 3      | 0      |
| 136    | 0    | 0    | 0    | 0    | 0    | 0    | 0        | 0        | 0        | 0        | 1        | 0        | 0      | 0      | 0      | 16     | 23     | 13     |
| 135    | 0    | 0    | 1    | 0    | 0    | 0    | 0        | 0        | 0        | 0        | 0        | 0        | 0      | 0      | 0      | 13     | 36     | 8      |
| 134    | 0    | 5    | 12   | 3    | 7    | 2    | 7        | 15       | 4        | 2        | 6        | 4        | 0      | 0      | 0      | 0      | 0      | 0      |
| 494    | 0    | 6    | 3    | 0    | 8    | 1    | 7        | 2        | 2        | 1        | 6        | 5        | 1      | 0      | 0      | 0      | 0      | 0      |
| 139    | 0    | 9    | 18   | 19   | 27   | 0    | 34       | 85       | 14       | 39       | 14       | 4        | 0      | 0      | 0      | 0      | 0      | 0      |
| 138    | 0    | 9    | 0    | 11   | 0    | 0    | 0        | 39       | 16       | 16       | 0        | 7        | 16     | 12     | 2      | 0      | 0      | 0      |
| 490    | 0    | 0    | 0    | 0    | 0    | 0    | 1        | 1        | 0        | 0        | 1        | 0        | 8      | 2      | 29     | 1      | 2      | 2      |
| 493    | 1    | 2    | 0    | 3    | 1    | 0    | 3        | 1        | 0        | 2        | 2        | 0        | 33     | 41     | 22     | 27     | 9      | 40     |
| 24     | 2    | 11   | 62   | 72   | 66   | 1    | 136      | 481      | 89       | 97       | 45       | 12       | 3      | 0      | 1      | 0      | 0      | 0      |
| 25     | 8    | 157  | 10   | 58   | 14   | 71   | 38       | 258      | 30       | 141      | 37       | 112      | 34     | 59     | 36     | 3      | 1      | 4      |
| 26     | 29   | 147  | 50   | 58   | 48   | 136  | 114      | 155      | 73       | 135      | 170      | 61       | 54     | 34     | 7      | 3      | 3      | 13     |
| 27     | 30   | 87   | 38   | 79   | 11   | 41   | 153      | 266      | 91       | 223      | 76       | 36       | 46     | 41     | 9      | 182    | 55     | 136    |
| 20     | 1    | 2    | 0    | 6    | 0    | 2    | 5        | 21       | 3        | 11       | 1        | 1        | 1274   | 860    | 366    | 104    | 36     | 100    |
| 21     | 53   | 174  | 156  | 28   | 188  | 140  | 248      | 91       | 140      | 60       | 309      | 116      | 92     | 74     | 26     | 80     | 22     | 65     |
| 22     | 70   | 44   | 21   | 109  | 7    | 31   | 181      | 210      | 121      | 175      | 21       | 25       | 543    | 540    | 147    | 56     | 24     | 66     |
| 23     | 3    | 21   | 2    | 7    | 4    | 9    | 26       | 21       | 18       | 14       | 6        | 12       | 457    | 319    | 84     | 345    | 71     | 253    |
| 28     | 2467 | 5860 | 4713 | 2198 | 4265 | 3585 | 7823     | 4509     | 6372     | 5407     | 8396     | 3777     | 1008   | 1046   | 473    | 260    | 110    | 362    |
| 29     | 2    | 15   | 39   | 46   | 51   | 0    | 111      | 266      | 54       | 79       | 28       | 7        | 2      | 0      | 3      | 0      | 2      | 0      |
| 407    | 0    | 0    | 0    | 0    | 0    | 3    | 0        | 1        | 1        | 0        | 0        | 0        | 6      | 9      | 3      | 5      | 1      | 5      |
| 402    | 0    | 15   | 1    | 1    | 0    | 2    | 5        | 2        | 1        | 0        | 1        | 2        | 1      | 1      | 1      | 0      | 0      | 0      |
| 401    | 0    | 4    | 29   | 19   | 17   | 0    | 48       | 97       | 19       | 21       | 11       | 4        | 0      | 0      | 3      | 0      | 0      | 0      |
| 400    | 0    | 0    | 64   | 0    | 45   | 0    | 13       | 0        | 5        | 0        | 31       | 0        | 0      | 0      | 0      | 13     | 32     | 1      |
| 932    | 0    | 10   | 8    | 1    | 5    | 1    | 2        | 5        | 3        | 0        | 0        | 2        | 0      | 0      | 1      | 0      | 0      | 0      |

| OTU ID | tox1 | tox2 | tox3 | tox4 | tox5 | tox6 | aegypti1 | aegypti2 | aegypti3 | aegypti4 | aegypti5 | aegypti6 | water1 | water2 | water3 | water4 | water5 | water6 |
|--------|------|------|------|------|------|------|----------|----------|----------|----------|----------|----------|--------|--------|--------|--------|--------|--------|
| 758    | 0    | 0    | 0    | 11   | 2    | 0    | 23       | 68       | 16       | 16       | 1        | 0        | 0      | 0      | 1      | 0      | 0      | 0      |
| 373    | 14   | 266  | 42   | 81   | 32   | 111  | 47       | 178      | 38       | 176      | 87       | 145      | 95     | 82     | 41     | 7      | 1      | 5      |
| 372    | 0    | 0    | 0    | 0    | 0    | 0    | 0        | 1        | 0        | 0        | 1        | 0        | 4      | 1      | 22     | 6      | 11     | 1      |
| 374    | 0    | 0    | 2    | 0    | 0    | 0    | 0        | 2        | 0        | 2        | 9        | 3        | 1      | 3      | 0      | 7      | 1      | 11     |
| 377    | 17   | 50   | 52   | 21   | 46   | 34   | 77       | 41       | 61       | 43       | 91       | 21       | 4      | 4      | 1      | 5      | 4      | 17     |
| 705    | 4    | 2    | 15   | 3    | 6    | 2    | 17       | 7        | 8        | 2        | 16       | 2        | 271    | 256    | 187    | 323    | 201    | 435    |
| 88     | 0    | 0    | 0    | 0    | 0    | 0    | 0        | 0        | 0        | 0        | 0        | 0        | 16     | 2      | 44     | 28     | 28     | 26     |
| 89     | 0    | 8    | 19   | 3    | 12   | 1    | 7        | 15       | 4        | 6        | 5        | 7        | 0      | 0      | 2      | 0      | 0      | 0      |
| 397    | 0    | 3    | 1    | 1    | 3    | 1    | 3        | 2        | 0        | 1        | 0        | 4        | 1      | 1      | 5      | 1      | 4      | 0      |
| 396    | 0    | 0    | 2    | 3    | 3    | 0    | 2        | 20       | 1        | 2        | 2        | 1        | 0      | 0      | 0      | 0      | 0      | 0      |
| 82     | 0    | 24   | 14   | 3    | 16   | 1    | 4        | 38       | 6        | 7        | 14       | 16       | 2      | 0      | 3      | 0      | 0      | 0      |
| 83     | 0    | 41   | 26   | 5    | 38   | 0    | 15       | 24       | 18       | 9        | 43       | 19       | 1      | 0      | 2      | 0      | 0      | 0      |
| 86     | 1    | 1    | 0    | 1    | 3    | 0    | 0        | 5        | 2        | 7        | 5        | 1        | 42     | 31     | 7      | 54     | 16     | 68     |
| 87     | 0    | 1    | 0    | 0    | 0    | 0    | 1        | 0        | 0        | 0        | 0        | 0        | 52     | 12     | 95     | 2      | 5      | 0      |
| 84     | 0    | 0    | 2    | 0    | 1    | 0    | 2        | 0        | 1        | 0        | 2        | 0        | 40     | 34     | 17     | 35     | 11     | 60     |
| 85     | 0    | 41   | 11   | 1    | 19   | 2    | 4        | 25       | 5        | 5        | 8        | 28       | 2      | 0      | 3      | 0      | 0      | 0      |
| 797    | 0    | 0    | 3    | 0    | 1    | 0    | 1        | 1        | 1        | 0        | 1        | 0        | 5      | 2      | 15     | 0      | 5      | 0      |
| 7      | 104  | 2494 | 317  | 546  | 276  | 1169 | 460      | 1230     | 295      | 1001     | 599      | 1234     | 853    | 777    | 282    | 41     | 17     | 57     |
| 585    | 0    | 0    | 0    | 0    | 0    | 0    | 0        | 0        | 0        | 0        | 0        | 0        | 7      | 2      | 23     | 6      | 19     | 1      |
| 413    | 0    | 0    | 0    | 0    | 0    | 0    | 0        | 0        | 0        | 0        | 0        | 0        | 0      | 0      | 3      | 6      | 19     | 4      |
| 245    | 0    | 24   | 12   | 4    | 12   | 1    | 19       | 30       | 0        | 1        | 12       | 9        | 3      | 0      | 3      | 0      | 0      | 0      |
| 244    | 0    | 9    | 5    | 2    | 10   | 0    | 1        | 6        | 1        | 1        | 8        | 7        | 0      | 0      | 0      | 0      | 0      | 0      |
| 241    | 0    | 0    | 1    | 0    | 1    | 0    | 1        | 0        | 1        | 0        | 1        | 0        | 20     | 12     | 2      | 4      | 3      | 13     |
| 240    | 0    | 16   | 0    | 4    | 0    | 5    | 0        | 20       | 0        | 14       | 0        | 10       | 3      | 0      | 0      | 0      | 0      | 0      |
| 243    | 0    | 0    | 0    | 0    | 0    | 0    | 0        | 0        | 0        | 0        | 0        | 0        | 8      | 2      | 31     | 0      | 3      | 1      |
| 242    | 0    | 0    | 0    | 0    | 0    | 0    | 0        | 0        | 0        | 0        | 0        | 0        | 11     | 3      | 25     | 0      | 0      | 0      |
| 149    | 0    | 1    | 0    | 6    | 2    | 0    | 1        | 8        | 0        | 4        | 3        | 5        | 28     | 25     | 4      | 13     | 3      | 18     |
| 249    | 0    | 0    | 0    | 0    | 0    | 0    | 0        | 0        | 0        | 0        | 0        | 0        | 6      | 2      | 16     | 10     | 23     | 4      |
| 970    | 0    | 0    | 0    | 0    | 0    | 0    | 0        | 0        | 0        | 0        | 0        | 0        | 0      | 2      | 17     | 21     | 3      | 3      |
| 459    | 0    | 6    | 5    | 2    | 4    | 1    | 1        | 5        | 1        | 1        | 2        | 5        | 2      | 0      | 23     | 1      | 3      | 0      |
| 621    | 974  | 2313 | 2198 | 511  | 1692 | 1492 | 2667     | 1549     | 2025     | 1213     | 3098     | 1587     | 378    | 314    | 183    | 120    | 27     | 137    |
| 627    | 1    | 9    | 36   | 26   | 38   | 0    | 114      | 183      | 35       | 45       | 23       | 9        | 3      | 0      | 2      | 0      | 0      | 1      |
| 626    | 3    | 1    | 2    | 2    | 1    | 3    | 7        | 2        | 3        | 2        | 2        | 3        | 62     | 41     | 10     | 59     | 10     | 38     |
| 625    | 0    | 0    | 0    | 0    | 0    | 0    | 0        | 0        | 0        | 0        | 0        | 0        | 5      | 1      | 18     | 5      | 6      | 4      |
| 450    | 0    | 0    | 1    | 2    | 0    | 0    | 4        | 1        | 3        | 0        | 0        | 0        | 4      | 3      | 0      | 5      | 2      | 11     |
| 457    | 0    | 0    | 0    | 0    | 0    | 0    | 0        | 0        | 0        | 0        | 0        | 0        | 15     | 1      | 32     | 0      | 0      | 0      |
| 179    | 0    | 3    | 5    | 1    | 1    | 0    | 1        | 13       | 0        | 2        | 3        | 2        | 0      | 0      | 0      | 0      | 0      | 0      |
| 178    | 0    | 0    | 0    | 0    | 0    | 0    | 0        | 5        | 0        | 0        | 0        | 0        | 25     | 4      | 37     | 0      | 3      | 0      |
| 595    | 0    | 0    | 0    | 0    | 0    | 0    | 0        | 0        | 0        | 0        | 0        | 0        | 6      | 1      | 18     | 5      | 4      | 1      |
| 175    | 1    | 0    | 1    | 1    | 3    | 0    | 2        | 1        | 0        | 0        | 2        | 0        | 2      | 1      | 1      | 29     | 7      | 21     |
| 174    | 0    | 0    | 1    | 1    | 0    | 1    | 2        | 0        | 2        | 3        | 3        | 1        | 15     | 9      | 3      | 19     | 4      | 26     |
| 173    | 0    | 0    | 5    | 0    | 2    | 0    | 2        | 2        | 0        | 1        | 5        | 0        | 12     | 0      | 37     | 5      | 6      | 5      |
| 172    | 0    | 3    | 2    | 0    | 1    | 0    | 1        | 6        | 1        | 0        | 0        | 2        | 10     | 3      | 35     | 2      | 4      | 1      |
| 171    | 0    | 0    | 0    | 0    | 0    | 0    | 0        | 0        | 0        | 0        | 0        | 0        | 6      | 1      | 13     | 5      | 12     | 6      |
| 170    | 0    | 0    | 0    | 0    | 0    | 0    | 0        | 0        | 0        | 0        | 0        | 1        | 13     | 2      | 37     | 15     | 8      | 5      |
| 183    | 0    | 0    | 1    | 0    | 0    | 0    | 0        | 3        | 0        | 1        | 0        | 0        | 34     | 27     | 12     | 14     | 2      | 3      |
| 654    | 0    | 0    | 22   | 0    | 25   | 0    | 8        | 0        | 3        | 0        | 19       | 0        | 0      | 0      | 6      | 11     | 3      | 3      |
| 253    | 0    | 1    | 0    | 4    | 0    | 2    | 0        | 9        | 0        | 12       | 1        | 5        | 5      | 5      | 1      | 4      | 0      | 1      |
| 657    | 0    | 7    | 4    | 3    | 10   | 0    | 7        | 20       | 1        | 1        | 9        | 9        | 0      | 0      | 0      | 0      | 0      | 0      |
| 180    | 0    | 1    | 6    | 0    | 5    | 0    | 3        | 1        | 2        | 0        | 3        | 0        | 5      | 2      | 33     | 5      | 6      | 2      |

| OTU ID | tox1 | tox2 | tox3 | tox4 | tox5 | tox6 | aegypti1 | aegypti2 | aegypti3 | aegypti4 | aegypti5 | aegypti6 | water1 | water2 | water3 | water4 | water5 | water6 |
|--------|------|------|------|------|------|------|----------|----------|----------|----------|----------|----------|--------|--------|--------|--------|--------|--------|
| 2      | 1760 | 308  | 713  | 2145 | 714  | 226  | 5442     | 5995     | 3269     | 4853     | 1416     | 219      | 95     | 95     | 35     | 29     | 8      | 26     |
| 186    | 0    | 2    | 1    | 0    | 1    | 0    | 0        | 3        | 1        | 0        | 0        | 0        | 6      | 2      | 20     | 4      | 1      | 1      |
| 187    | 0    | 29   | 2    | 1    | 3    | 1    | 1        | 3        | 1        | 0        | 2        | 20       | 0      | 0      | 0      | 0      | 0      | 0      |
| 185    | 0    | 3    | 0    | 0    | 0    | 0    | 0        | 1        | 0        | 0        | 0        | 2        | 14     | 1      | 29     | 1      | 1      | 1      |
| 188    | 0    | 0    | 0    | 0    | 0    | 0    | 0        | 1        | 0        | 2        | 0        | 0        | 30     | 32     | 21     | 0      | 0      | 0      |
| 189    | 0    | 3    | 3    | 4    | 2    | 1    | 5        | 42       | 2        | 3        | 1        | 0        | 0      | 0      | 0      | 0      | 0      | 0      |
| 197    | 0    | 0    | 0    | 0    | 0    | 0    | 1        | 2        | 0        | 0        | 1        | 0        | 12     | 1      | 43     | 0      | 3      | 0      |
| 184    | 0    | 0    | 0    | 0    | 0    | 0    | 0        | 0        | 0        | 0        | 0        | 0        | 8      | 1      | 13     | 15     | 16     | 4      |
| 192    | 0    | 1    | 0    | 0    | 1    | 0    | 0        | 3        | 0        | 0        | 1        | 1        | 10     | 3      | 24     | 1      | 3      | 1      |
| 11     | 9    | 238  | 28   | 35   | 22   | 155  | 28       | 63       | 25       | 66       | 45       | 112      | 1426   | 1089   | 304    | 420    | 134    | 502    |
| 10     | 43   | 43   | 36   | 30   | 28   | 36   | 119      | 126      | 79       | 102      | 59       | 32       | 1395   | 1346   | 802    | 1686   | 862    | 2250   |
| 13     | 5    | 34   | 66   | 5    | 82   | 7    | 38       | 15       | 20       | 13       | 110      | 17       | 1005   | 813    | 612    | 849    | 416    | 995    |
| 12     | 79   | 218  | 53   | 44   | 52   | 178  | 258      | 136      | 158      | 138      | 80       | 131      | 1197   | 1048   | 408    | 1337   | 479    | 1629   |
| 15     | 113  | 727  | 305  | 215  | 327  | 570  | 474      | 701      | 276      | 593      | 650      | 408      | 99     | 75     | 12     | 36     | 4      | 21     |
| 14     | 6    | 196  | 41   | 42   | 28   | 123  | 16       | 70       | 23       | 104      | 71       | 89       | 3017   | 3344   | 675    | 102    | 21     | 152    |
| 17     | 3    | 43   | 7    | 22   | 6    | 37   | 21       | 51       | 18       | 55       | 8        | 34       | 2144   | 1686   | 636    | 69     | 13     | 61     |
| 16     | 25   | 44   | 96   | 24   | 73   | 18   | 67       | 73       | 40       | 51       | 133      | 31       | 350    | 339    | 239    | 312    | 128    | 379    |
| 19     | 26   | 1612 | 76   | 70   | 60   | 870  | 63       | 141      | 29       | 164      | 139      | 752      | 41     | 19     | 10     | 53     | 11     | 38     |
| 18     | 0    | 47   | 0    | 12   | 0    | 32   | 0        | 32       | 0        | 26       | 0        | 37       | 1148   | 887    | 360    | 0      | 0      | 0      |
| 884    | 0    | 19   | 3    | 0    | 3    | 1    | 0        | 0        | 0        | 1        | 6        | 2        | 0      | 0      | 0      | 0      | 0      | 0      |
| 889    | 1    | 6    | 6    | 5    | 10   | 14   | 4        | 7        | 6        | 8        | 23       | 3        | 1      | 0      | 0      | 1      | 0      | 1      |
| 355    | 0    | 0    | 0    | 0    | 0    | 0    | 0        | 0        | 0        | 0        | 0        | 0        | 15     | 2      | 13     | 0      | 1      | 0      |
| 320    | 0    | 4    | 4    | 0    | 10   | 1    | 2        | 9        | 2        | 0        | 6        | 1        | 1      | 0      | 0      | 0      | 0      | 0      |
| 324    | 0    | 16   | 0    | 0    | 4    | 0    | 0        | 0        | 0        | 1        | 1        | 11       | 0      | 0      | 0      | 0      | 0      | 0      |
| 325    | 0    | 0    | 0    | 1    | 0    | 0    | 1        | 1        | 0        | 2        | 0        | 0        | 4      | 2      | 11     | 10     | 5      | 4      |
| 201    | 0    | 5    | 3    | 1    | 6    | 0    | 3        | 6        | 2        | 3        | 3        | 4        | 0      | 0      | 0      | 0      | 0      | 0      |
| 774    | 0    | 30   | 16   | 2    | 6    | 1    | 9        | 18       | 6        | 4        | 19       | 16       | 0      | 0      | 1      | 0      | 0      | 0      |
| 203    | 0    | 0    | 0    | 0    | 0    | 0    | 0        | 0        | 0        | 0        | 0        | 0        | 8      | 7      | 22     | 8      | 11     | 1      |
| 776    | 0    | 2    | 6    | 4    | 1    | 0    | 3        | 12       | 3        | 6        | 8        | 8        | 0      | 0      | 0      | 0      | 0      | 0      |
| 204    | 0    | 0    | 0    | 0    | 0    | 0    | 0        | 0        | 0        | 0        | 0        | 0        | 11     | 2      | 19     | 1      | 0      | 0      |
| 207    | 0    | 34   | 1    | 8    | 1    | 29   | 2        | 14       | 2        | 15       | 1        | 20       | 36     | 32     | 4      | 22     | 4      | 19     |
| 209    | 0    | 1    | 2    | 0    | 4    | 0    | 2        | 3        | 1        | 1        | 3        | 1        | 10     | 3      | 20     | 5      | 3      | 1      |
| 208    | 0    | 3    | 5    | 0    | 3    | 0    | 4        | 4        | 1        | 2        | 1        | 1        | 14     | 2      | 30     | 2      | 10     | 4      |
| 77     | 2    | 47   | 13   | 20   | 10   | 12   | 18       | 60       | 9        | 13       | 10       | 22       | 3      | 1      | 0      | 1      | 1      | 0      |
| 76     | 0    | 5    | 10   | 4    | 4    | 0    | 5        | 24       | 2        | 8        | 4        | 4        | 23     | 13     | 70     | 12     | 17     | 5      |
| 75     | 1    | 48   | 5    | 19   | 10   | 24   | 19       | 71       | 8        | 51       | 5        | 28       | 0      | 0      | 1      | 0      | 1      | 0      |
| 74     | 1    | 23   | 1    | 26   | 0    | 13   | 6        | 21       | 7        | 54       | 0        | 11       | 28     | 37     | 7      | 19     | 5      | 31     |
| 73     | 0    | 0    | 0    | 0    | 0    | 0    | 0        | 1        | 0        | 1        | 0        | 0        | 65     | 19     | 122    | 5      | 6      | 2      |
| 72     | 0    | 2    | 6    | 2    | 13   | 0    | 6        | 1        | 0        | 2        | 7        | 7        | 0      | 0      | 1      | 4      | 3      | 1      |
| 71     | 0    | 0    | 51   | 0    | 57   | 0    | 8        | 0        | 2        | 0        | 25       | 0        | 0      | 0      | 12     | 25     | 5      | 5      |
| 70     | 1    | 0    | 1    | 10   | 1    | 0    | 34       | 103      | 24       | 20       | 0        | 0        | 1      | 0      | 0      | 0      | 0      | 0      |
| 79     | 3    | 56   | 18   | 1    | 32   | 37   | 1        | 0        | 8        | 0        | 98       | 37       | 0      | 0      | 0      | 0      | 0      | 0      |
| 78     | 0    | 0    | 1    | 0    | 2    | 0    | 0        | 0        | 0        | 0        | 0        | 0        | 0      | 0      | 0      | 71     | 138    | 34     |
| 1143   | 0    | 16   | 0    | 1    | 3    | 0    | 0        | 19       | 0        | 3        | 2        | 7        | 2      | 0      | 2      | 0      | 0      | 0      |
| 1145   | 0    | 0    | 0    | 0    | 0    | 0    | 0        | 0        | 0        | 0        | 0        | 0        | 7      | 1      | 20     | 8      | 18     | 2      |
| 667    | 0    | 0    | 0    | 2    | 0    | 0    | 5        | 22       | 1        | 3        | 0        | 0        | 2      | 0      | 2      | 2      | 1      | 0      |
| 666    | 0    | 5    | 15   | 17   | 16   | 1    | 43       | 130      | 23       | 33       | 17       | 7        | 1      | 1      | 7      | 0      | 0      | 1      |
| 692    | 0    | 3    | 9    | 1    | 8    | 1    | 0        | 3        | 2        | 5        | 3        | 5        | 2      | 2      | 5      | 1      | 0      | 1      |
| 690    | 0    | 0    | 0    | 0    | 0    | 0    | 1        | 1        | 0        | 0        | 0        | 0        | 7      | 0      | 26     | 1      | 1      | 0      |
| 694    | 0    | 0    | 5    | 0    | 14   | 0    | 4        | 0        | 0        | 0        | 17       | 0        | 0      | 0      | 0      | 6      | 4      | 2      |



| OTU ID | tox1 | tox2 | tox3 | tox4 | tox5 | tox6 | aegypti1 | aegypti2 | aegypti3 | aegypti4 | aegypti5 | aegypti6 | water1 | water2 | water3 | water4 | water5 | water6 |
|--------|------|------|------|------|------|------|----------|----------|----------|----------|----------|----------|--------|--------|--------|--------|--------|--------|
| 223    | 0    | 0    | 0    | 3    | 0    | 0    | 6        | 30       | 1        | 1        | 0        | 0        | 0      | 0      | 0      | 0      | 0      | 0      |
| 698    | 1    | 1    | 6    | 2    | 7    | 1    | 12       | 5        | 2        | 1        | 13       | 3        | 203    | 144    | 148    | 230    | 111    | 167    |
| 545    | 0    | 1    | 2    | 0    | 2    | 0    | 0        | 8        | 1        | 0        | 2        | 0        | 2      | 1      | 10     | 2      | 0      | 0      |
| 8      | 36   | 42   | 21   | 14   | 21   | 26   | 164      | 48       | 99       | 39       | 38       | 13       | 1314   | 1051   | 568    | 1223   | 670    | 1525   |
| 120    | 0    | 0    | 1    | 0    | 5    | 0    | 0        | 0        | 0        | 0        | 0        | 0        | 2      | 1      | 24     | 0      | 5      | 0      |
| 121    | 0    | 0    | 0    | 1    | 0    | 0    | 0        | 2        | 0        | 0        | 0        | 0        | 21     | 5      | 54     | 2      | 7      | 2      |
| 122    | 1    | 18   | 3    | 4    | 9    | 3    | 9        | 23       | 4        | 6        | 11       | 16       | 3      | 0      | 2      | 0      | 0      | 0      |
| 123    | 0    | 0    | 1    | 7    | 1    | 0    | 7        | 49       | 3        | 4        | 1        | 0        | 0      | 0      | 0      | 0      | 0      | 0      |
| 124    | 0    | 0    | 0    | 10   | 0    | 0    | 12       | 73       | 9        | 17       | 0        | 0        | 0      | 0      | 0      | 0      | 0      | 0      |
| 125    | 0    | 20   | 5    | 3    | 8    | 2    | 1        | 16       | 1        | 5        | 4        | 8        | 3      | 1      | 5      | 0      | 0      | 0      |
| 126    | 0    | 0    | 11   | 6    | 6    | 1    | 31       | 45       | 11       | 11       | 10       | 2        | 0      | 0      | 0      | 0      | 0      | 0      |
| 127    | 3    | 0    | 5    | 0    | 1    | 2    | 11       | 2        | 8        | 2        | 13       | 0        | 88     | 83     | 43     | 68     | 33     | 103    |
| 128    | 0    | 2    | 0    | 0    | 0    | 1    | 1        | 4        | 0        | 1        | 1        | 0        | 20     | 10     | 3      | 42     | 9      | 43     |
| 129    | 0    | 0    | 0    | 8    | 0    | 0    | 8        | 64       | 4        | 9        | 0        | 0        | 0      | 0      | 0      | 0      | 0      | 0      |
| 404    | 0    | 0    | 1    | 0    | 2    | 0    | 1        | 2        | 0        | 1        | 1        | 1        | 6      | 0      | 16     | 2      | 3      | 2      |
| 416    | 0    | 11   | 3    | 0    | 2    | 0    | 0        | 16       | 1        | 1        | 1        | 14       | 4      | 0      | 4      | 0      | 0      | 0      |
| 411    | 2    | 1    | 2    | 0    | 2    | 0    | 6        | 7        | 5        | 0        | 11       | 1        | 62     | 47     | 43     | 45     | 28     | 66     |
| 418    | 2    | 7    | 18   | 21   | 21   | 0    | 54       | 76       | 31       | 25       | 14       | 1        | 0      | 0      | 0      | 0      | 0      | 0      |
| 313    | 0    | 0    | 2    | 0    | 1    | 0    | 0        | 0        | 0        | 0        | 0        | 0        | 0      | 0      | 0      | 11     | 22     | 1      |
| 312    | 0    | 5    | 0    | 6    | 1    | 2    | 8        | 11       | 1        | 14       | 1        | 4        | 0      | 0      | 0      | 0      | 0      | 0      |
| 311    | 0    | 0    | 0    | 0    | 0    | 0    | 0        | 0        | 0        | 0        | 0        | 0        | 8      | 2      | 17     | 10     | 17     | 7      |
| 317    | 0    | 3    | 1    | 2    | 2    | 0    | 2        | 19       | 1        | 1        | 2        | 0        | 0      | 0      | 1      | 0      | 0      | 0      |
| 316    | 5    | 238  | 10   | 23   | 18   | 80   | 19       | 91       | 11       | 44       | 20       | 135      | 22     | 20     | 6      | 1      | 2      | 4      |
| 315    | 0    | 0    | 0    | 3    | 0    | 0    | 4        | 35       | 0        | 0        | 1        | 0        | 0      | 0      | 0      | 0      | 0      | 0      |
| 808    | 0    | 0    | 0    | 0    | 0    | 0    | 0        | 2        | 0        | 0        | 0        | 0        | 7      | 1      | 20     | 0      | 1      | 0      |
| 3      | 159  | 7    | 1080 | 0    | 1032 | 4    | 522      | 2        | 370      | 2        | 2126     | 2        | 0      | 0      | 0      | 7288   | 3609   | 7958   |
| 368    | 0    | 13   | 2    | 0    | 4    | 0    | 2        | 9        | 0        | 1        | 2        | 3        | 0      | 0      | 1      | 0      | 0      | 0      |
| 367    | 0    | 0    | 10   | 0    | 8    | 0    | 9        | 0        | 3        | 0        | 0        | 0        | 0      | 0      | 0      | 2      | 1      | 0      |
| 364    | 0    | 0    | 10   | 0    | 7    | 0    | 0        | 0        | 0        | 0        | 11       | 0        | 0      | 0      | 0      | 0      | 7      | 0      |
| 365    | 0    | 0    | 0    | 0    | 0    | 0    | 0        | 0        | 0        | 0        | 0        | 0        | 17     | 6      | 12     | 1      | 2      | 0      |
| 362    | 0    | 0    | 0    | 0    | 0    | 0    | 0        | 0        | 0        | 0        | 0        | 0        | 11     | 2      | 27     | 0      | 0      | 0      |
| 363    | 1    | 0    | 3    | 0    | 0    | 2    | 0        | 2        | 3        | 2        | 0        | 0        | 18     | 16     | 6      | 20     | 3      | 25     |
| 360    | 0    | 0    | 0    | 0    | 0    | 0    | 0        | 0        | 0        | 0        | 0        | 0        | 4      | 1      | 9      | 3      | 12     | 4      |
| 361    | 4    | 10   | 3    | 4    | 3    | 0    | 16       | 6        | 11       | 6        | 6        | 2        | 147    | 129    | 78     | 175    | 82     | 173    |
| 380    | 0    | 0    | 0    | 0    | 0    | 0    | 1        | 1        | 0        | 1        | 0        | 0        | 13     | 4      | 41     | 1      | 8      | 1      |
| 382    | 0    | 0    | 0    | 0    | 0    | 0    | 0        | 0        | 0        | 0        | 0        | 0        | 7      | 1      | 24     | 2      | 1      | 0      |
| 785    | 2021 | 4390 | 3756 | 1961 | 3297 | 2931 | 5533     | 3235     | 4574     | 4775     | 6371     | 2852     | 656    | 674    | 332    | 192    | 57     | 162    |
| 780    | 0    | 19   | 3    | 1    | 1    | 1    | 0        | 10       | 0        | 1        | 3        | 13       | 1      | 0      | 3      | 0      | 0      | 0      |
| 148    | 0    | 0    | 0    | 0    | 0    | 0    | 0        | 1        | 0        | 0        | 0        | 0        | 27     | 2      | 45     | 1      | 0      | 0      |
| 252    | 1    | 3    | 2    | 0    | 1    | 7    | 7        | 4        | 3        | 5        | 5        | 4        | 1      | 0      | 1      | 12     | 1      | 6      |
| 151    | 0    | 0    | 0    | 0    | 0    | 0    | 0        | 0        | 0        | 0        | 0        | 0        | 5      | 1      | 21     | 19     | 24     | 5      |
| 571    | 2    | 2    | 14   | 1    | 22   | 1    | 8        | 0        | 5        | 1        | 16       | 1        | 122    | 94     | 107    | 132    | 86     | 119    |
| 570    | 0    | 0    | 0    | 0    | 1    | 0    | 0        | 0        | 0        | 0        | 0        | 0        | 0      | 0      | 0      | 12     | 13     | 6      |
| 60     | 0    | 0    | 0    | 0    | 0    | 0    | 0        | 0        | 0        | 0        | 0        | 0        | 24     | 2      | 62     | 28     | 76     | 17     |
| 61     | 0    | 50   | 6    | 6    | 9    | 0    | 0        | 56       | 3        | 3        | 1        | 51       | 11     | 1      | 15     | 0      | 1      | 0      |
| 258    | 0    | 0    | 0    | 0    | 0    | 0    | 0        | 0        | 0        | 0        | 0        | 0        | 0      | 0      | 0      | 18     | 26     | 2      |
| 63     | 4    | 7    | 18   | 3    | 20   | 5    | 13       | 17       | 8        | 9        | 38       | 3        | 219    | 191    | 127    | 168    | 63     | 227    |
| 64     | 3    | 101  | 8    | 17   | 10   | 43   | 23       | 27       | 11       | 35       | 20       | 34       | 2      | 0      | 0      | 3      | 0      | 2      |
| 65     | 0    | 17   | 26   | 5    | 34   | 1    | 18       | 23       | 5        | 5        | 26       | 20       | 0      | 0      | 0      | 0      | 0      | 0      |
| 66     | 0    | 0    | 28   | 0    | 42   | 0    | 4        | 0        | 2        | 0        | 21       | 0        | 0      | 0      | 0      | 7      | 9      | 2      |

| OTU ID | tox1 | tox2 | tox3 | tox4 | tox5 | tox6 | aegypti1 | aegypti2 | aegypti3 | aegypti4 | aegypti5 | aegypti6 | water1 | water2 | water3 | water4 | water5 | water6 |
|--------|------|------|------|------|------|------|----------|----------|----------|----------|----------|----------|--------|--------|--------|--------|--------|--------|
| 67     | 0    | 0    | 51   | 0    | 75   | 0    | 19       | 0        | 7        | 0        | 52       | 1        | 0      | 0      | 0      | 10     | 15     | 13     |
| 68     | 3    | 27   | 10   | 13   | 15   | 14   | 10       | 17       | 7        | 20       | 16       | 13       | 5      | 2      | 1      | 3      | 2      | 4      |
| 69     | 0    | 21   | 18   | 4    | 22   | 1    | 10       | 39       | 4        | 3        | 12       | 10       | 0      | 0      | 0      | 0      | 0      | 0      |
| 250    | 0    | 1    | 0    | 0    | 0    | 0    | 0        | 1        | 0        | 2        | 0        | 0        | 12     | 4      | 24     | 0      | 0      | 0      |
| 251    | 0    | 9    | 0    | 0    | 1    | 0    | 0        | 3        | 1        | 1        | 0        | 5        | 5      | 0      | 17     | 2      | 0      | 0      |
| 256    | 0    | 5    | 2    | 1    | 0    | 0    | 0        | 2        | 0        | 1        | 2        | 4        | 15     | 9      | 20     | 1      | 1      | 0      |
| 499    | 0    | 0    | 0    | 0    | 0    | 0    | 0        | 1        | 0        | 0        | 0        | 0        | 13     | 1      | 23     | 5      | 2      | 0      |
| 734    | 0    | 0    | 0    | 0    | 2    | 0    | 0        | 0        | 0        | 0        | 2        | 0        | 0      | 0      | 0      | 7      | 20     | 6      |
| 737    | 1    | 13   | 1    | 1    | 2    | 10   | 2        | 1        | 2        | 1        | 6        | 8        | 38     | 38     | 12     | 10     | 9      | 18     |
| 1033   | 0    | 0    | 0    | 0    | 0    | 0    | 0        | 0        | 0        | 0        | 0        | 0        | 11     | 0      | 21     | 3      | 4      | 1      |
| 504    | 0    | 5    | 6    | 1    | 5    | 0    | 5        | 11       | 0        | 2        | 3        | 6        | 0      | 0      | 0      | 0      | 0      | 0      |
| 502    | 0    | 27   | 3    | 0    | 4    | 0    | 0        | 10       | 0        | 2        | 4        | 15       | 2      | 1      | 6      | 0      | 0      | 0      |
| 633    | 0    | 9    | 3    | 1    | 2    | 0    | 3        | 7        | 0        | 4        | 2        | 4        | 0      | 0      | 0      | 0      | 0      | 0      |
| 468    | 0    | 3    | 0    | 4    | 0    | 3    | 1        | 6        | 0        | 7        | 2        | 1        | 1      | 3      | 1      | 0      | 0      | 0      |
| 1214   | 0    | 0    | 0    | 0    | 0    | 0    | 0        | 0        | 0        | 0        | 0        | 0        | 14     | 4      | 24     | 2      | 0      | 0      |
| 637    | 0    | 3    | 2    | 0    | 2    | 0    | 8        | 3        | 0        | 3        | 1        | 0        | 10     | 1      | 11     | 4      | 0      | 3      |
| 464    | 0    | 3    | 9    | 0    | 13   | 0    | 6        | 13       | 2        | 3        | 8        | 4        | 1      | 0      | 0      | 0      | 0      | 0      |
| 168    | 0    | 16   | 7    | 4    | 6    | 1    | 3        | 21       | 0        | 6        | 6        | 11       | 3      | 0      | 3      | 0      | 0      | 0      |
| 169    | 0    | 6    | 2    | 1    | 5    | 1    | 5        | 5        | 0        | 1        | 12       | 1        | 0      | 0      | 0      | 0      | 0      | 0      |
| 164    | 0    | 3    | 1    | 1    | 2    | 0    | 6        | 3        | 3        | 4        | 2        | 6        | 3      | 1      | 19     | 0      | 8      | 0      |
| 165    | 0    | 5    | 6    | 0    | 14   | 1    | 2        | 8        | 1        | 1        | 6        | 6        | 0      | 0      | 0      | 0      | 0      | 0      |
| 166    | 0    | 0    | 0    | 4    | 0    | 0    | 8        | 32       | 1        | 7        | 1        | 0        | 0      | 0      | 0      | 0      | 1      | 0      |
| 167    | 0    | 12   | 1    | 2    | 5    | 0    | 0        | 9        | 0        | 2        | 0        | 9        | 1      | 0      | 5      | 0      | 0      | 0      |
| 160    | 0    | 1    | 0    | 0    | 0    | 0    | 0        | 0        | 0        | 0        | 0        | 1        | 17     | 5      | 43     | 6      | 11     | 2      |
| 161    | 0    | 0    | 0    | 2    | 0    | 0    | 9        | 34       | 2        | 7        | 0        | 0        | 0      | 0      | 0      | 0      | 0      | 0      |
| 163    | 0    | 1    | 2    | 1    | 2    | 0    | 2        | 10       | 3        | 1        | 2        | 3        | 7      | 0      | 19     | 6      | 8      | 1      |
| 409    | 0    | 0    | 0    | 0    | 0    | 0    | 0        | 0        | 0        | 0        | 0        | 0        | 6      | 1      | 15     | 3      | 6      | 1      |
| 877    | 40   | 191  | 124  | 41   | 108  | 154  | 197      | 177      | 100      | 107      | 255      | 93       | 14     | 8      | 6      | 8      | 3      | 10     |
| 9      | 12   | 18   | 44   | 12   | 57   | 16   | 91       | 29       | 49       | 28       | 119      | 16       | 1403   | 1294   | 770    | 1636   | 779    | 1964   |
| 439    | 0    | 4    | 5    | 1    | 10   | 0    | 6        | 9        | 0        | 2        | 20       | 1        | 0      | 0      | 0      | 0      | 0      | 0      |
| 255    | 0    | 0    | 0    | 0    | 0    | 0    | 0        | 0        | 0        | 0        | 0        | 0        | 8      | 0      | 25     | 0      | 0      | 0      |
| 357    | 0    | 1    | 0    | 0    | 0    | 7    | 1        | 0        | 1        | 0        | 1        | 0        | 4      | 10     | 3      | 9      | 3      | 7      |
| 356    | 0    | 6    | 0    | 4    | 0    | 1    | 0        | 13       | 0        | 2        | 0        | 6        | 1      | 2      | 6      | 0      | 0      | 0      |
| 353    | 0    | 0    | 0    | 0    | 0    | 0    | 0        | 0        | 0        | 0        | 0        | 0        | 0      | 0      | 0      | 26     | 41     | 10     |
| 350    | 0    | 0    | 0    | 0    | 0    | 0    | 0        | 0        | 0        | 0        | 0        | 0        | 9      | 2      | 33     | 5      | 22     | 2      |
| 216    | 0    | 0    | 1    | 0    | 0    | 0    | 0        | 0        | 0        | 0        | 0        | 0        | 0      | 0      | 0      | 27     | 37     | 5      |
| 217    | 0    | 0    | 0    | 0    | 0    | 0    | 0        | 0        | 0        | 0        | 0        | 0        | 7      | 1      | 66     | 12     | 26     | 5      |
| 214    | 3    | 1    | 0    | 6    | 6    | 0    | 7        | 9        | 1        | 7        | 6        | 0        | 10     | 5      | 0      | 10     | 1      | 8      |
| 212    | 1    | 4    | 19   | 12   | 12   | 0    | 25       | 70       | 17       | 21       | 6        | 2        | 4      | 2      | 5      | 1      | 1      | 1      |
| 213    | 0    | 3    | 5    | 3    | 5    | 0    | 12       | 29       | 5        | 14       | 7        | 1        | 0      | 0      | 0      | 0      | 0      | 0      |
| 210    | 0    | 0    | 0    | 5    | 0    | 0    | 4        | 34       | 2        | 4        | 0        | 0        | 0      | 0      | 0      | 0      | 0      | 0      |
| 218    | 0    | 4    | 0    | 2    | 1    | 6    | 1        | 6        | 0        | 4        | 3        | 6        | 14     | 7      | 1      | 8      | 2      | 7      |
| 219    | 0    | 11   | 20   | 29   | 34   | 1    | 64       | 165      | 37       | 45       | 32       | 6        | 1      | 0      | 1      | 0      | 0      | 0      |
| 41     | 17   | 5    | 40   | 2    | 38   | 4    | 51       | 9        | 29       | 13       | 95       | 4        | 10     | 18     | 6      | 130    | 52     | 146    |
| 269    | 0    | 0    | 0    | 0    | 1    | 0    | 0        | 2        | 0        | 1        | 0        | 1        | 1      | 1      | 22     | 0      | 2      | 2      |
| 992    | 0    | 0    | 0    | 0    | 0    | 0    | 0        | 1        | 0        | 0        | 0        | 0        | 29     | 4      | 40     | 0      | 0      | 0      |
| 1079   | 0    | 0    | 27   | 0    | 21   | 0    | 6        | 0        | 0        | 0        | 10       | 0        | 0      | 0      | 0      | 4      | 14     | 4      |
| 1074   | 0    | 0    | 0    | 0    | 0    | 0    | 0        | 0        | 0        | 0        | 0        | 0        | 3      | 0      | 11     | 5      | 15     | 2      |
| 289    | 0    | 0    | 0    | 0    | 0    | 0    | 0        | 0        | 0        | 0        | 0        | 0        | 8      | 2      | 68     | 11     | 66     | 4      |
| 4      | 523  | 7    | 17   | 803  | 14   | 11   | 1704     | 2509     | 1104     | 1801     | 38       | 2        | 23     | 16     | 6      | 16     | 3      | 32     |

| OTU ID | tox1 | tox2 | tox3 | tox4 | tox5 | tox6 | aegypti1 | aegypti2 | aegypti3 | aegypti4 | aegypti5 | aegypti6 | water1 | water2 | water3 | water4 | water5 | water6 |
|--------|------|------|------|------|------|------|----------|----------|----------|----------|----------|----------|--------|--------|--------|--------|--------|--------|
| 281    | 0    | 5    | 0    | 1    | 0    | 0    | 1        | 27       | 2        | 3        | 1        | 4        | 1      | 1      | 2      | 0      | 0      | 0      |
| 280    | 0    | 2    | 1    | 1    | 2    | 4    | 4        | 2        | 4        | 3        | 11       | 3        | 0      | 0      | 0      | 0      | 0      | 0      |
| 283    | 0    | 5    | 3    | 0    | 3    | 0    | 23       | 2        | 1        | 4        | 6        | 3        | 0      | 0      | 0      | 0      | 0      | 0      |
| 282    | 0    | 1    | 1    | 1    | 0    | 0    | 0        | 4        | 1        | 2        | 1        | 1        | 7      | 2      | 20     | 0      | 1      | 0      |
| 285    | 0    | 0    | 0    | 0    | 2    | 0    | 0        | 0        | 0        | 0        | 0        | 0        | 0      | 0      | 0      | 10     | 24     | 1      |
| 284    | 0    | 8    | 3    | 4    | 3    | 2    | 8        | 5        | 6        | 6        | 6        | 2        | 0      | 1      | 1      | 1      | 0      | 2      |
| 287    | 0    | 16   | 13   | 4    | 16   | 0    | 5        | 24       | 2        | 5        | 7        | 4        | 1      | 0      | 1      | 0      | 0      | 0      |
| 263    | 0    | 0    | 0    | 1    | 0    | 1    | 2        | 0        | 1        | 2        | 2        | 1        | 16     | 13     | 2      | 11     | 1      | 9      |
| 262    | 0    | 0    | 0    | 0    | 0    | 0    | 0        | 0        | 0        | 0        | 0        | 0        | 11     | 11     | 16     | 1      | 0      | 0      |
| 261    | 0    | 0    | 0    | 0    | 0    | 0    | 0        | 0        | 0        | 0        | 0        | 0        | 0      | 0      | 0      | 8      | 34     | 7      |
| 260    | 0    | 0    | 0    | 0    | 0    | 0    | 0        | 0        | 0        | 0        | 0        | 0        | 12     | 1      | 25     | 0      | 0      | 0      |
| 267    | 2    | 6    | 0    | 2    | 3    | 4    | 4        | 4        | 1        | 4        | 4        | 1        | 4      | 6      | 3      | 5      | 2      | 10     |
| 266    | 0    | 20   | 4    | 3    | 6    | 0    | 6        | 10       | 1        | 7        | 5        | 18       | 21     | 3      | 50     | 4      | 3      | 1      |
| 265    | 2    | 5    | 5    | 0    | 10   | 1    | 5        | 4        | 2        | 0        | 11       | 1        | 0      | 0      | 0      | 7      | 3      | 9      |
| 264    | 5    | 23   | 15   | 18   | 9    | 15   | 36       | 41       | 24       | 44       | 14       | 5        | 494    | 449    | 354    | 493    | 337    | 596    |
| 268    | 0    | 0    | 0    | 7    | 1    | 0    | 5        | 18       | 0        | 0        | 0        | 0        | 0      | 0      | 0      | 0      | 0      | 0      |
| 182    | 0    | 0    | 0    | 7    | 0    | 0    | 10       | 24       | 7        | 11       | 0        | 0        | 0      | 0      | 0      | 0      | 0      | 0      |
| 1082   | 0    | 0    | 0    | 0    | 0    | 0    | 0        | 0        | 0        | 0        | 0        | 0        | 7      | 4      | 23     | 0      | 2      | 0      |
| 59     | 12   | 1    | 9    | 6    | 11   | 0    | 31       | 21       | 17       | 20       | 40       | 3        | 8      | 7      | 6      | 76     | 35     | 91     |
| 58     | 343  | 6    | 11   | 662  | 11   | 0    | 1380     | 1879     | 902      | 1371     | 24       | 3        | 19     | 25     | 7      | 17     | 4      | 9      |
| 55     | 1    | 0    | 4    | 1    | 8    | 1    | 17       | 8        | 11       | 6        | 22       | 1        | 33     | 22     | 8      | 129    | 50     | 128    |
| 54     | 0    | 0    | 0    | 0    | 0    | 0    | 1        | 1        | 1        | 0        | 0        | 0        | 28     | 6      | 108    | 42     | 102    | 23     |
| 57     | 3    | 2    | 0    | 1    | 2    | 1    | 13       | 7        | 9        | 2        | 7        | 0        | 110    | 81     | 28     | 101    | 60     | 113    |
| 56     | 5    | 29   | 2    | 30   | 0    | 12   | 24       | 67       | 10       | 86       | 2        | 18       | 17     | 8      | 0      | 11     | 3      | 14     |
| 51     | 0    | 100  | 0    | 10   | 1    | 80   | 2        | 6        | 1        | 16       | 0        | 49       | 53     | 42     | 8      | 0      | 0      | 1      |
| 50     | 0    | 1    | 0    | 1    | 2    | 0    | 8        | 1        | 7        | 2        | 3        | 0        | 65     | 66     | 26     | 84     | 32     | 97     |
| 53     | 4    | 1    | 20   | 0    | 16   | 2    | 3        | 1        | 6        | 1        | 36       | 3        | 52     | 51     | 14     | 95     | 20     | 87     |
| 52     | 1    | 3    | 0    | 3    | 0    | 1    | 7        | 33       | 4        | 8        | 2        | 0        | 71     | 68     | 149    | 111    | 144    | 69     |
| 259    | 287  | 3    | 10   | 650  | 7    | 10   | 1319     | 1899     | 864      | 1476     | 17       | 1        | 9      | 14     | 8      | 14     | 1      | 14     |
| 152    | 0    | 0    | 0    | 6    | 0    | 0    | 10       | 56       | 12       | 14       | 0        | 0        | 0      | 0      | 1      | 0      | 0      | 0      |
| 988    | 0    | 5    | 0    | 0    | 0    | 1    | 0        | 0        | 0        | 0        | 0        | 0        | 13     | 18     | 3      | 0      | 0      | 0      |
| 200    | 1    | 1    | 7    | 0    | 7    | 0    | 1        | 5        | 4        | 2        | 5        | 2        | 0      | 0      | 3      | 0      | 1      | 0      |
| 115    | 0    | 6    | 29   | 25   | 41   | 0    | 61       | 221      | 28       | 46       | 15       | 11       | 1      | 0      | 3      | 0      | 0      | 0      |
| 114    | 0    | 13   | 3    | 0    | 1    | 0    | 1        | 7        | 1        | 0        | 1        | 5        | 15     | 4      | 20     | 2      | 4      | 1      |
| 117    | 0    | 37   | 4    | 1    | 4    | 0    | 0        | 5        | 3        | 3        | 3        | 26       | 0      | 0      | 0      | 0      | 0      | 0      |
| 202    | 0    | 22   | 0    | 10   | 0    | 22   | 0        | 6        | 0        | 14       | 0        | 14       | 1      | 0      | 1      | 0      | 0      | 1      |
| 111    | 0    | 0    | 0    | 0    | 0    | 0    | 0        | 0        | 0        | 0        | 0        | 0        | 18     | 4      | 47     | 22     | 54     | 8      |
| 110    | 0    | 5    | 7    | 0    | 7    | 1    | 3        | 28       | 2        | 3        | 5        | 5        | 0      | 1      | 0      | 0      | 0      | 0      |
| 113    | 0    | 0    | 0    | 0    | 0    | 0    | 1        | 0        | 0        | 0        | 0        | 0        | 0      | 0      | 0      | 33     | 26     | 13     |
| 112    | 2    | 2    | 0    | 1    | 3    | 1    | 33       | 8        | 17       | 1        | 3        | 0        | 182    | 131    | 71     | 182    | 102    | 238    |
| 205    | 0    | 0    | 0    | 0    | 0    | 0    | 0        | 0        | 0        | 0        | 0        | 0        | 10     | 12     | 30     | 0      | 1      | 0      |
| 119    | 0    | 14   | 6    | 2    | 5    | 0    | 6        | 13       | 1        | 9        | 5        | 8        | 0      | 0      | 3      | 0      | 0      | 0      |
| 118    | 0    | 0    | 0    | 0    | 0    | 0    | 0        | 0        | 0        | 0        | 0        | 0        | 0      | 0      | 0      | 17     | 45     | 5      |
| 206    | 0    | 0    | 0    | 0    | 0    | 0    | 0        | 0        | 0        | 0        | 0        | 0        | 0      | 0      | 0      | 16     | 26     | 6      |
| 428    | 7    | 10   | 7    | 10   | 14   | 7    | 85       | 20       | 68       | 14       | 20       | 8        | 602    | 540    | 279    | 567    | 368    | 744    |
| 421    | 0    | 0    | 0    | 0    | 1    | 0    | 0        | 0        | 0        | 0        | 1        | 0        | 0      | 0      | 0      | 16     | 43     | 12     |
| 914    | 22   | 31   | 27   | 9    | 30   | 27   | 56       | 19       | 26       | 14       | 73       | 17       | 22     | 15     | 5      | 18     | 3      | 20     |
| 423    | 0    | 0    | 0    | 0    | 0    | 0    | 0        | 0        | 0        | 0        | 0        | 0        | 6      | 0      | 24     | 10     | 15     | 0      |
| 422    | 11   | 22   | 13   | 33   | 10   | 20   | 41       | 51       | 37       | 54       | 33       | 14       | 535    | 590    | 389    | 703    | 361    | 785    |
| 427    | 0    | 6    | 1    | 0    | 1    | 0    | 1        | 5        | 1        | 0        | 1        | 1        | 6      | 1      | 9      | 2      | 3      | 0      |

| OTU ID | tox1 | tox2 | tox3 | tox4 | tox5 | tox6 | aegypti1 | aegypti2 | aegypti3 | aegypti4 | aegypti5 | aegypti6 | water1 | water2 | water3 | water4 | water5 | water6 |
|--------|------|------|------|------|------|------|----------|----------|----------|----------|----------|----------|--------|--------|--------|--------|--------|--------|
| 308    | 0    | 22   | 0    | 1    | 2    | 0    | 0        | 1        | 0        | 0        | 0        | 17       | 0      | 0      | 1      | 0      | 0      | 0      |
| 309    | 0    | 0    | 0    | 0    | 0    | 0    | 0        | 0        | 0        | 0        | 0        | 0        | 13     | 4      | 19     | 0      | 0      | 0      |
| 300    | 0    | 0    | 0    | 10   | 0    | 0    | 11       | 59       | 4        | 7        | 0        | 0        | 0      | 0      | 0      | 0      | 0      | 0      |
| 305    | 0    | 0    | 2    | 4    | 8    | 0    | 5        | 17       | 6        | 2        | 0        | 0        | 0      | 0      | 0      | 0      | 0      | 0      |
| 181    | 0    | 0    | 1    | 0    | 0    | 0    | 0        | 0        | 0        | 0        | 0        | 0        | 0      | 0      | 0      | 11     | 22     | 6      |
| 848    | 0    | 0    | 0    | 0    | 0    | 0    | 0        | 0        | 0        | 0        | 0        | 0        | 9      | 2      | 22     | 13     | 23     | 2      |
| 62     | 0    | 0    | 1    | 0    | 1    | 0    | 5        | 0        | 7        | 0        | 8        | 0        | 0      | 0      | 0      | 147    | 52     | 150    |
| 145    | 0    | 0    | 0    | 0    | 0    | 0    | 0        | 0        | 0        | 0        | 0        | 0        | 7      | 1      | 26     | 7      | 23     | 5      |
| 755    | 0    | 0    | 0    | 0    | 0    | 0    | 0        | 0        | 0        | 0        | 0        | 0        | 4      | 1      | 28     | 8      | 25     | 3      |
| 561    | 1    | 0    | 17   | 0    | 17   | 0    | 4        | 0        | 1        | 0        | 12       | 0        | 0      | 0      | 0      | 5      | 8      | 1      |
| 562    | 2    | 8    | 5    | 0    | 1    | 0    | 0        | 0        | 0        | 0        | 11       | 0        | 3      | 0      | 0      | 6      | 1      | 8      |
| 229    | 0    | 13   | 2    | 0    | 0    | 1    | 1        | 13       | 0        | 8        | 0        | 9        | 4      | 0      | 6      | 0      | 0      | 0      |
| 228    | 0    | 0    | 0    | 0    | 0    | 0    | 0        | 0        | 0        | 0        | 0        | 0        | 0      | 0      | 0      | 7      | 23     | 6      |
| 227    | 0    | 10   | 1    | 3    | 1    | 15   | 0        | 7        | 1        | 7        | 1        | 1        | 7      | 9      | 2      | 5      | 3      | 4      |
| 226    | 0    | 8    | 7    | 2    | 5    | 1    | 8        | 13       | 7        | 1        | 1        | 7        | 11     | 4      | 27     | 5      | 7      | 3      |
| 225    | 0    | 1    | 7    | 1    | 8    | 0    | 9        | 30       | 1        | 5        | 5        | 0        | 0      | 0      | 0      | 0      | 0      | 0      |
| 224    | 0    | 0    | 0    | 3    | 0    | 0    | 2        | 35       | 1        | 7        | 0        | 0        | 0      | 0      | 1      | 0      | 0      | 0      |
| 222    | 0    | 1    | 1    | 2    | 0    | 0    | 0        | 5        | 0        | 0        | 0        | 1        | 9      | 2      | 18     | 0      | 3      | 0      |
| 221    | 0    | 0    | 0    | 0    | 0    | 0    | 0        | 0        | 0        | 0        | 0        | 0        | 13     | 6      | 41     | 1      | 1      | 0      |
| 220    | 0    | 0    | 0    | 0    | 0    | 0    | 0        | 0        | 0        | 0        | 0        | 0        | 17     | 11     | 16     | 1      | 3      | 4      |
| 1021   | 0    | 0    | 0    | 3    | 0    | 0    | 5        | 16       | 3        | 5        | 0        | 0        | 0      | 0      | 0      | 0      | 0      | 0      |
| 1188   | 0    | 1    | 4    | 0    | 8    | 0    | 2        | 26       | 3        | 3        | 3        | 0        | 0      | 0      | 0      | 0      | 0      | 0      |
| 1184   | 2    | 11   | 30   | 3    | 30   | 6    | 19       | 2        | 12       | 6        | 41       | 4        | 393    | 390    | 221    | 394    | 237    | 588    |
| 1029   | 0    | 3    | 1    | 0    | 2    | 0    | 0        | 6        | 1        | 2        | 0        | 2        | 12     | 2      | 20     | 0      | 0      | 0      |
| 391    | 0    | 0    | 2    | 0    | 4    | 0    | 1        | 0        | 0        | 0        | 1        | 0        | 7      | 0      | 19     | 3      | 2      | 1      |
| 116    | 0    | 1    | 0    | 0    | 0    | 0    | 0        | 0        | 0        | 0        | 0        | 0        | 43     | 8      | 62     | 4      | 1      | 1      |
| 150    | 0    | 0    | 0    | 0    | 0    | 0    | 0        | 0        | 0        | 0        | 0        | 0        | 18     | 4      | 47     | 14     | 24     | 5      |
| 153    | 2    | 10   | 4    | 1    | 6    | 11   | 15       | 8        | 8        | 12       | 12       | 10       | 4      | 1      | 2      | 4      | 2      | 8      |
| 154    | 0    | 0    | 0    | 0    | 0    | 0    | 0        | 0        | 0        | 0        | 0        | 0        | 0      | 0      | 0      | 21     | 27     | 3      |
| 159    | 0    | 8    | 11   | 0    | 10   | 0    | 0        | 11       | 1        | 0        | 2        | 2        | 0      | 0      | 0      | 0      | 0      | 0      |
| 158    | 1    | 4    | 4    | 2    | 5    | 0    | 4        | 14       | 0        | 4        | 6        | 3        | 0      | 0      | 1      | 0      | 0      | 0      |
| 608    | 0    | 9    | 5    | 5    | 10   | 1    | 3        | 19       | 3        | 3        | 5        | 8        | 0      | 0      | 2      | 0      | 0      | 0      |
| 80     | 0    | 7    | 5    | 2    | 7    | 0    | 5        | 17       | 2        | 8        | 4        | 5        | 15     | 13     | 60     | 11     | 16     | 4      |
| 81     | 0    | 0    | 1    | 0    | 1    | 0    | 0        | 0        | 0        | 0        | 1        | 0        | 0      | 0      | 0      | 51     | 100    | 18     |
| 48     | 1    | 147  | 36   | 1    | 29   | 41   | 1        | 0        | 9        | 4        | 98       | 37       | 0      | 1      | 0      | 1      | 0      | 0      |
| 49     | 0    | 57   | 11   | 8    | 14   | 0    | 1        | 71       | 2        | 5        | 0        | 53       | 3      | 1      | 7      | 0      | 0      | 0      |
| 46     | 5    | 6    | 3    | 3    | 2    | 4    | 23       | 11       | 11       | 16       | 7        | 3        | 277    | 263    | 223    | 446    | 232    | 604    |
| 47     | 0    | 0    | 2    | 26   | 2    | 0    | 63       | 202      | 36       | 44       | 1        | 0        | 0      | 0      | 0      | 1      | 0      | 0      |
| 44     | 2    | 2    | 0    | 9    | 3    | 8    | 25       | 29       | 4        | 24       | 3        | 3        | 77     | 69     | 18     | 115    | 43     | 159    |
| 45     | 1    | 6    | 23   | 20   | 15   | 0    | 50       | 116      | 19       | 40       | 14       | 4        | 0      | 0      | 3      | 0      | 0      | 0      |
| 42     | 2    | 36   | 5    | 1    | 7    | 17   | 8        | 7        | 3        | 6        | 15       | 22       | 73     | 71     | 31     | 27     | 9      | 45     |
| 43     | 1    | 6    | 39   | 48   | 42   | 1    | 112      | 246      | 32       | 65       | 33       | 12       | 1      | 0      | 2      | 0      | 0      | 0      |
| 40     | 4    | 104  | 0    | 77   | 6    | 94   | 3        | 213      | 3        | 151      | 6        | 74       | 15     | 3      | 4      | 1      | 0      | 0      |
| 5      | 262  | 3851 | 926  | 647  | 903  | 2036 | 1290     | 2083     | 890      | 1326     | 1718     | 2018     | 865    | 779    | 247    | 44     | 17     | 51     |
| 488    | 0    | 0    | 1    | 0    | 4    | 0    | 1        | 0        | 0        | 0        | 4        | 0        | 0      | 0      | 0      | 16     | 22     | 6      |
| 487    | 0    | 0    | 0    | 0    | 0    | 1    | 0        | 0        | 0        | 0        | 0        | 3        | 7      | 2      | 19     | 0      | 0      | 0      |
| 485    | 0    | 0    | 0    | 0    | 0    | 0    | 1        | 5        | 0        | 0        | 0        | 0        | 26     | 6      | 46     | 3      | 6      | 8      |
| 481    | 1    | 5    | 2    | 0    | 4    | 1    | 4        | 0        | 3        | 3        | 6        | 0        | 1      | 1      | 0      | 0      | 0      | 1      |
| 480    | 1    | 0    | 0    | 0    | 5    | 0    | 5        | 2        | 1        | 0        | 3        | 1        | 0      | 1      | 0      | 7      | 2      | 10     |
| 470    | 0    | 4    | 8    | 4    | 7    | 6    | 2        | 6        | 4        | 6        | 3        | 4        | 7      | 2      | 0      | 2      | 0      | 0      |

| OTU ID | tox1 | tox2 | tox3 | tox4 | tox5 | tox6 | aegypti1 | aegypti2 | aegypti3 | aegypti4 | aegypti5 | aegypti6 | water1 | water2 | water3 | water4 | water5 | water6 |
|--------|------|------|------|------|------|------|----------|----------|----------|----------|----------|----------|--------|--------|--------|--------|--------|--------|
| 471    | 0    | 15   | 1    | 0    | 2    | 0    | 1        | 3        | 2        | 0        | 0        | 9        | 0      | 0      | 0      | 0      | 0      | 0      |
| 477    | 0    | 0    | 0    | 0    | 0    | 0    | 0        | 0        | 0        | 0        | 0        | 0        | 15     | 3      | 35     | 1      | 0      | 0      |
| 479    | 0    | 6    | 1    | 1    | 0    | 0    | 1        | 16       | 0        | 1        | 0        | 0        | 1      | 0      | 8      | 0      | 0      | 1      |

**Supplementary Table 2.** [See Pages 15-18]

**Table S2.** Prevalence and taxonomic assignment of shared OTUs in *T. amboinensis* larvae, their *A. aegypti* prey, and water samples.

| OTU ID | tox1 | tox2 | tox3 | tox4 | tox5 | tox6 | aegypti1 | aegypti2 | aegypti3 | aegypti4 | aegypti5 | aegypti6 | water1 | water2 | water3 | water4 | water5 | water6 |
|--------|------|------|------|------|------|------|----------|----------|----------|----------|----------|----------|--------|--------|--------|--------|--------|--------|
| 818    | 44   | 2    | 348  | 2    | 368  | 2    | 211      | 2        | 131      | 0        | 718      | 2        | 0      | 0      | 0      | 2050   | 1283   | 2062   |
| 0      | 5151 | 8820 | 7440 | 3457 | 6259 | 5604 | 11798    | 6998     | 8962     | 8434     | 12545    | 5793     | 1464   | 1407   | 613    | 383    | 139    | 577    |
| 340    | 3    | 34   | 57   | 52   | 47   | 1    | 163      | 361      | 73       | 124      | 35       | 38       | 40     | 12     | 79     | 11     | 7      | 3      |
| 348    | 5    | 1    | 2    | 2    | 2    | 1    | 12       | 2        | 10       | 2        | 2        | 0        | 118    | 93     | 40     | 116    | 58     | 121    |
| 1016   | 358  | 80   | 176  | 314  | 180  | 51   | 1136     | 1274     | 679      | 767      | 331      | 40       | 28     | 21     | 13     | 5      | 5      | 7      |
| 102    | 1    | 3    | 3    | 4    | 3    | 4    | 1        | 7        | 2        | 11       | 4        | 0        | 28     | 33     | 18     | 16     | 10     | 25     |
| 101    | 1    | 17   | 18   | 2    | 9    | 1    | 10       | 22       | 2        | 2        | 13       | 14       | 0      | 0      | 1      | 0      | 0      | 0      |
| 38     | 22   | 9    | 12   | 21   | 13   | 6    | 108      | 48       | 69       | 37       | 32       | 5        | 54     | 43     | 21     | 151    | 45     | 132    |
| 32     | 5    | 189  | 43   | 90   | 30   | 176  | 58       | 175      | 27       | 250      | 86       | 157      | 20     | 20     | 8      | 10     | 1      | 8      |
| 31     | 11   | 199  | 18   | 43   | 14   | 135  | 51       | 99       | 35       | 131      | 40       | 80       | 56     | 39     | 12     | 80     | 17     | 35     |
| 30     | 8    | 16   | 15   | 13   | 14   | 16   | 19       | 35       | 22       | 29       | 54       | 5        | 177    | 126    | 24     | 284    | 66     | 336    |
| 37     | 3    | 224  | 3    | 52   | 7    | 135  | 6        | 122      | 7        | 123      | 8        | 139      | 32     | 33     | 8      | 1      | 0      | 3      |
| 35     | 20   | 65   | 60   | 22   | 67   | 28   | 89       | 52       | 65       | 35       | 108      | 17       | 3      | 3      | 1      | 6      | 7      | 13     |
| 433    | 1    | 2    | 6    | 1    | 1    | 2    | 9        | 11       | 3        | 3        | 5        | 5        | 385    | 235    | 94     | 38     | 19     | 27     |
| 333    | 10   | 237  | 29   | 44   | 25   | 177  | 41       | 73       | 19       | 86       | 67       | 98       | 1086   | 1023   | 355    | 432    | 166    | 405    |
| 6      | 333  | 1548 | 1359 | 396  | 1163 | 932  | 1356     | 946      | 1066     | 922      | 2683     | 766      | 218    | 193    | 48     | 122    | 39     | 193    |
| 91     | 5    | 26   | 7    | 13   | 11   | 17   | 20       | 25       | 25       | 22       | 24       | 4        | 466    | 490    | 303    | 660    | 382    | 790    |
| 237    | 4    | 3    | 22   | 4    | 23   | 1    | 14       | 13       | 10       | 9        | 37       | 7        | 228    | 211    | 133    | 150    | 68     | 194    |
| 1      | 103  | 160  | 105  | 164  | 96   | 121  | 430      | 376      | 331      | 370      | 195      | 89       | 4813   | 4664   | 3122   | 5915   | 3128   | 7573   |
| 155    | 13   | 56   | 14   | 36   | 15   | 40   | 40       | 102      | 31       | 83       | 50       | 35       | 19     | 12     | 3      | 1      | 1      | 4      |
| 1179   | 2    | 9    | 10   | 2    | 6    | 1    | 3        | 7        | 6        | 7        | 10       | 1        | 33     | 27     | 40     | 29     | 18     | 21     |
| 944    | 1586 | 3426 | 2819 | 1180 | 2770 | 2355 | 4867     | 2886     | 3484     | 3082     | 5211     | 2281     | 529    | 555    | 276    | 150    | 55     | 167    |
| 24     | 2    | 11   | 62   | 72   | 66   | 1    | 136      | 481      | 89       | 97       | 45       | 12       | 3      | 0      | 1      | 0      | 0      | 0      |
| 25     | 8    | 157  | 10   | 58   | 14   | 71   | 38       | 258      | 30       | 141      | 37       | 112      | 34     | 59     | 36     | 3      | 1      | 4      |
| 26     | 29   | 147  | 50   | 58   | 48   | 136  | 114      | 155      | 73       | 135      | 170      | 61       | 54     | 34     | 7      | 3      | 3      | 13     |
| 27     | 30   | 87   | 38   | 79   | 11   | 41   | 153      | 266      | 91       | 223      | 76       | 36       | 46     | 41     | 9      | 182    | 55     | 136    |
| 21     | 53   | 174  | 156  | 28   | 188  | 140  | 248      | 91       | 140      | 60       | 309      | 116      | 92     | 74     | 26     | 80     | 22     | 65     |
| 22     | 70   | 44   | 21   | 109  | 7    | 31   | 181      | 210      | 121      | 175      | 21       | 25       | 543    | 540    | 147    | 56     | 24     | 66     |
| 23     | 3    | 21   | 2    | 7    | 4    | 9    | 26       | 21       | 18       | 14       | 6        | 12       | 457    | 319    | 84     | 345    | 71     | 253    |
| 28     | 2467 | 5860 | 4713 | 2198 | 4265 | 3585 | 7823     | 4509     | 6372     | 5407     | 8396     | 3777     | 1008   | 1046   | 473    | 260    | 110    | 362    |
| 373    | 14   | 266  | 42   | 81   | 32   | 111  | 47       | 178      | 38       | 176      | 87       | 145      | 95     | 82     | 41     | 7      | 1      | 5      |
| 377    | 17   | 50   | 52   | 21   | 46   | 34   | 77       | 41       | 61       | 43       | 91       | 21       | 4      | 4      | 1      | 5      | 4      | 17     |
| 705    | 4    | 2    | 15   | 3    | 6    | 2    | 17       | 7        | 8        | 2        | 16       | 2        | 271    | 256    | 187    | 323    | 201    | 435    |
| 7      | 104  | 2494 | 317  | 546  | 276  | 1169 | 460      | 1230     | 295      | 1001     | 599      | 1234     | 853    | 777    | 282    | 41     | 17     | 57     |
| 621    | 974  | 2313 | 2198 | 511  | 1692 | 1492 | 2667     | 1549     | 2025     | 1213     | 3098     | 1587     | 378    | 314    | 183    | 120    | 27     | 137    |
| 626    | 3    | 1    | 2    | 2    | 1    | 3    | 7        | 2        | 3        | 2        | 2        | 3        | 62     | 41     | 10     | 59     | 10     | 38     |
| 2      | 1760 | 308  | 713  | 2145 | 714  | 226  | 5442     | 5995     | 3269     | 4853     | 1416     | 219      | 95     | 95     | 35     | 29     | 8      | 26     |
| 11     | 9    | 238  | 28   | 35   | 22   | 155  | 28       | 63       | 25       | 66       | 45       | 112      | 1426   | 1089   | 304    | 420    | 134    | 502    |
| 10     | 43   | 43   | 36   | 30   | 28   | 36   | 119      | 126      | 79       | 102      | 59       | 32       | 1395   | 1346   | 802    | 1686   | 862    | 2250   |
| 13     | 5    | 34   | 66   | 5    | 82   | 7    | 38       | 15       | 20       | 13       | 110      | 17       | 1005   | 813    | 612    | 849    | 416    | 995    |
| 12     | 79   | 218  | 53   | 44   | 52   | 178  | 258      | 136      | 158      | 138      | 80       | 131      | 1197   | 1048   | 408    | 1337   | 479    | 1629   |
| 15     | 113  | 727  | 305  | 215  | 327  | 570  | 474      | 701      | 276      | 593      | 650      | 408      | 99     | 75     | 12     | 36     | 4      | 21     |
| 14     | 6    | 196  | 41   | 42   | 28   | 123  | 16       | 70       | 23       | 104      | 71       | 89       | 3017   | 3344   | 675    | 102    | 21     | 152    |
| 17     | 3    | 43   | 7    | 22   | 6    | 37   | 21       | 51       | 18       | 55       | 8        | 34       | 2144   | 1686   | 636    | 69     | 13     | 61     |
| 16     | 25   | 44   | 96   | 24   | 73   | 18   | 67       | 73       | 40       | 51       | 133      | 31       | 350    | 339    | 239    | 312    | 128    | 379    |
| 19     | 26   | 1612 | 76   | 70   | 60   | 870  | 63       | 141      | 29       | 164      | 139      | 752      | 41     | 19     | 10     | 53     | 11     | 38     |
| 889    | 1    | 6    | 6    | 5    | 10   | 14   | 4        | 7        | 6        | 8        | 23       | 3        | 1      | 0      | 0      | 1      | 0      | 1      |
| 77     | 2    | 47   | 13   | 20   | 10   | 12   | 18       | 60       | 9        | 13       | 10       | 22       | 3      | 1      | 0      | 1      | 1      | 0      |
| 75     | 1    | 48   | 5    | 19   | 10   | 24   | 19       | 71       | 8        | 51       | 5        | 28       | 0      | 0      | 1      | 0      | 1      | 0      |

| OTU ID | tox1 | tox2 | tox3 | tox4 | tox5 | tox6 | aegypti1 | aegypti2 | aegypti3 | aegypti4 | aegypti5 | aegypti6 | water1 | water2 | water3 | water4 | water5 | water6 |
|--------|------|------|------|------|------|------|----------|----------|----------|----------|----------|----------|--------|--------|--------|--------|--------|--------|
| 79     | 3    | 56   | 18   | 1    | 32   | 37   | 1        | 0        | 8        | 0        | 98       | 37       | 0      | 0      | 0      | 0      | 0      | 0      |
| 698    | 1    | 1    | 6    | 2    | 7    | 1    | 12       | 5        | 2        | 1        | 13       | 3        | 203    | 144    | 148    | 230    | 111    | 167    |
| 8      | 36   | 42   | 21   | 14   | 21   | 26   | 164      | 48       | 99       | 39       | 38       | 13       | 1314   | 1051   | 568    | 1223   | 670    | 1525   |
| 122    | 1    | 18   | 3    | 4    | 9    | 3    | 9        | 23       | 4        | 6        | 11       | 16       | 3      | 0      | 2      | 0      | 0      | 0      |
| 316    | 5    | 238  | 10   | 23   | 18   | 80   | 19       | 91       | 11       | 44       | 20       | 135      | 22     | 20     | 6      | 1      | 2      | 4      |
| 785    | 2021 | 4390 | 3756 | 1961 | 3297 | 2931 | 5533     | 3235     | 4574     | 4775     | 6371     | 2852     | 656    | 674    | 332    | 192    | 57     | 162    |
| 571    | 2    | 2    | 14   | 1    | 22   | 1    | 8        | 0        | 5        | 1        | 16       | 1        | 122    | 94     | 107    | 132    | 86     | 119    |
| 63     | 4    | 7    | 18   | 3    | 20   | 5    | 13       | 17       | 8        | 9        | 38       | 3        | 219    | 191    | 127    | 168    | 63     | 227    |
| 64     | 3    | 101  | 8    | 17   | 10   | 43   | 23       | 27       | 11       | 35       | 20       | 34       | 2      | 0      | 0      | 3      | 0      | 2      |
| 68     | 3    | 27   | 10   | 13   | 15   | 14   | 10       | 17       | 7        | 20       | 16       | 13       | 5      | 2      | 1      | 3      | 2      | 4      |
| 737    | 1    | 13   | 1    | 1    | 2    | 10   | 2        | 1        | 2        | 1        | 6        | 8        | 38     | 38     | 12     | 10     | 9      | 18     |
| 877    | 40   | 191  | 124  | 41   | 108  | 154  | 197      | 177      | 100      | 107      | 255      | 93       | 14     | 8      | 6      | 8      | 3      | 10     |
| 9      | 12   | 18   | 44   | 12   | 57   | 16   | 91       | 29       | 49       | 28       | 119      | 16       | 1403   | 1294   | 770    | 1636   | 779    | 1964   |
| 41     | 17   | 5    | 40   | 2    | 38   | 4    | 51       | 9        | 29       | 13       | 95       | 4        | 10     | 18     | 6      | 130    | 52     | 146    |
| 4      | 523  | 7    | 17   | 803  | 14   | 11   | 1704     | 2509     | 1104     | 1801     | 38       | 2        | 23     | 16     | 6      | 16     | 3      | 32     |
| 264    | 5    | 23   | 15   | 18   | 9    | 15   | 36       | 41       | 24       | 44       | 14       | 5        | 494    | 449    | 354    | 493    | 337    | 596    |
| 259    | 287  | 3    | 10   | 650  | 7    | 10   | 1319     | 1899     | 864      | 1476     | 17       | 1        | 9      | 14     | 8      | 14     | 1      | 14     |
| 428    | 7    | 10   | 7    | 10   | 14   | 7    | 85       | 20       | 68       | 14       | 20       | 8        | 602    | 540    | 279    | 567    | 368    | 744    |
| 914    | 22   | 31   | 27   | 9    | 30   | 27   | 56       | 19       | 26       | 14       | 73       | 17       | 22     | 15     | 5      | 18     | 3      | 20     |
| 422    | 11   | 22   | 13   | 33   | 10   | 20   | 41       | 51       | 37       | 54       | 33       | 14       | 535    | 590    | 389    | 703    | 361    | 785    |
| 1184   | 2    | 11   | 30   | 3    | 30   | 6    | 19       | 2        | 12       | 6        | 41       | 4        | 393    | 390    | 221    | 394    | 237    | 588    |
| 153    | 2    | 10   | 4    | 1    | 6    | 11   | 15       | 8        | 8        | 12       | 12       | 10       | 4      | 1      | 2      | 4      | 2      | 8      |
| 48     | 1    | 147  | 36   | 1    | 29   | 41   | 1        | 0        | 9        | 4        | 98       | 37       | 0      | 1      | 0      | 1      | 0      | 0      |
| 46     | 5    | 6    | 3    | 3    | 2    | 4    | 23       | 11       | 11       | 16       | 7        | 3        | 277    | 263    | 223    | 446    | 232    | 604    |
| 42     | 2    | 36   | 5    | 1    | 7    | 17   | 8        | 7        | 3        | 6        | 15       | 22       | 73     | 71     | 31     | 27     | 9      | 45     |
| 43     | 1    | 6    | 39   | 48   | 42   | 1    | 112      | 246      | 32       | 65       | 33       | 12       | 1      | 0      | 2      | 0      | 0      | 0      |
| 5      | 262  | 3851 | 926  | 647  | 903  | 2036 | 1290     | 2083     | 890      | 1326     | 1718     | 2018     | 865    | 779    | 247    | 44     | 17     | 51     |



**Table S2.** Prevalence and taxonomic assignment of shared OTUs in *T. amboinensis* larvae, their *A. aegypti* prey, and water samples.

| OTU ID | taxonomy                                                                                                                             |
|--------|--------------------------------------------------------------------------------------------------------------------------------------|
| 818    | k__Bacteria; p__Proteobacteria; c__Betaproteobacteria; o__Neisseriales; f__Neisseriaceae; g__Vogesella; s__                          |
| 0      | k__Bacteria; p__Proteobacteria; c__Gammaproteobacteria; o__Pseudomonadales; f__Moraxellaceae; g__Acinetobacter; s__rhizosphaerae     |
| 340    | k__Bacteria; p__Proteobacteria; c__Gammaproteobacteria; o__Pseudomonadales; f__Moraxellaceae; g__Acinetobacter                       |
| 348    | k__Bacteria; p__Bacteroidetes; c__Sphingobacteria; o__Sphingobacteriales; f__Sphingobacteriaceae; g__Sphingobacterium; s__multivorum |
| 1016   | k__Bacteria; p__Proteobacteria; c__Gammaproteobacteria; o__Enterobacteriales; f__Enterobacteriaceae; g__Rahnella; s__aquatilis       |
| 102    | k__Bacteria; p__Bacteroidetes; c__Sphingobacteria; o__Sphingobacteriales; f__Sphingobacteriaceae; g__Pedobacter; s__                 |
| 101    | k__Bacteria; p__Bacteroidetes; c__Sphingobacteria; o__Sphingobacteriales; f__Sphingobacteriaceae; g__Pedobacter                      |
| 38     | k__Bacteria; p__Actinobacteria; c__Actinobacteria; o__Actinomycetales; f__Micrococcaceae; g__Arthrobacter                            |
| 32     | k__Bacteria; p__Proteobacteria; c__Alphaproteobacteria; o__Rhodospirillales; f__Acetobacteraceae; g__Rhodovarius; s__lipocyclicus    |
| 31     | k__Bacteria; p__Proteobacteria; c__Gammaproteobacteria; o__Xanthomonadales; f__Xanthomonadaceae; g__Stenotrophomonas; s__geniculata  |
| 30     | k__Bacteria; p__Proteobacteria; c__Betaproteobacteria; o__Burkholderiales; f__Oxalobacteraceae                                       |
| 37     | k__Bacteria; p__Bacteroidetes; c__Sphingobacteria; o__Sphingobacteriales; f__Sphingobacteriaceae; g__Pedobacter; s__                 |
| 35     | k__Bacteria; p__Bacteroidetes; c__Cytophagia; o__Cytophagales; f__Cytophagaceae; g__Siphonobacter; s__aquaeclarae                    |
| 433    | k__Bacteria; p__Proteobacteria; c__Betaproteobacteria; o__Burkholderiales; f__Comamonadaceae                                         |
| 333    | k__Bacteria; p__Proteobacteria; c__Gammaproteobacteria; o__Aeromonadales; f__Aeromonadaceae; g__Aeromonas; s__hydrophila             |
| 6      | k__Bacteria; p__Bacteroidetes; c__[Saprospirae]; o__[Saprospirales]; f__Chitinophagaceae; g__; s__                                   |
| 91     | k__Bacteria; p__Bacteroidetes; c__Flavobacteria; o__Flavobacteriales; f__[Weeksellaceae]; g__Cloacibacterium; s__                    |
| 237    | k__Bacteria; p__Firmicutes; c__Clostridia; o__Clostridiales; f__Clostridiaceae; g__Clostridium; s__                                  |
| 1      | k__Bacteria; p__Bacteroidetes; c__Flavobacteria; o__Flavobacteriales; f__[Weeksellaceae]; g__Cloacibacterium; s__                    |
| 155    | k__Bacteria; p__Proteobacteria; c__Betaproteobacteria; o__Methylophilales; f__Methylophilaceae; g__Methylotenera; s__mobilis         |
| 1179   | k__Bacteria; p__Firmicutes; c__Clostridia; o__Clostridiales; f__Clostridiaceae; g__Clostridium; s__                                  |
| 944    | k__Bacteria; p__Proteobacteria; c__Gammaproteobacteria; o__Pseudomonadales; f__Moraxellaceae; g__Acinetobacter; s__rhizosphaerae     |
| 24     | k__Bacteria; p__Proteobacteria; c__Gammaproteobacteria                                                                               |
| 25     | k__Bacteria; p__Proteobacteria; c__Deltaproteobacteria; o__Bdellovibrionales; f__Bdellovibrionaceae; g__Bdellovibrio; s__            |
| 26     | k__Bacteria; p__Proteobacteria; c__Betaproteobacteria; o__Methylophilales; f__Methylophilaceae; g__Methylotenera; s__mobilis         |
| 27     | k__Bacteria; p__Proteobacteria; c__Betaproteobacteria; o__Burkholderiales; f__Comamonadaceae; g__Delftia; s__                        |
| 21     | k__Bacteria; p__Proteobacteria; c__Betaproteobacteria; o__Burkholderiales; f__Comamonadaceae                                         |
| 22     | k__Bacteria; p__Bacteroidetes; c__Flavobacteria; o__Flavobacteriales; f__[Weeksellaceae]; g__Elizabethkingia; s__meningoseptica      |
| 23     | k__Bacteria; p__Proteobacteria; c__Betaproteobacteria; o__Burkholderiales; f__Comamonadaceae; g__Azohydromonas; s__                  |
| 28     | k__Bacteria; p__Proteobacteria; c__Gammaproteobacteria; o__Pseudomonadales; f__Moraxellaceae; g__Acinetobacter; s__rhizosphaerae     |
| 373    | k__Bacteria; p__Bacteroidetes; c__Sphingobacteria; o__Sphingobacteriales; f__Sphingobacteriaceae                                     |
| 377    | k__Bacteria; p__Bacteroidetes; c__Cytophagia; o__Cytophagales; f__Cytophagaceae; g__Siphonobacter; s__aquaeclarae                    |
| 705    | k__Bacteria; p__Firmicutes; c__Clostridia; o__Clostridiales; f__Clostridiaceae; g__Clostridium                                       |
| 7      | k__Bacteria; p__Bacteroidetes; c__Sphingobacteria; o__Sphingobacteriales; f__Sphingobacteriaceae                                     |
| 621    | k__Bacteria; p__Proteobacteria; c__Gammaproteobacteria; o__Pseudomonadales; f__Moraxellaceae; g__Acinetobacter; s__rhizosphaerae     |
| 626    | k__Bacteria; p__Proteobacteria; c__Betaproteobacteria; o__Burkholderiales; f__Comamonadaceae; g__Azohydromonas; s__                  |
| 2      | k__Bacteria; p__Proteobacteria; c__Gammaproteobacteria; o__Enterobacteriales; f__Enterobacteriaceae; g__Rahnella; s__aquatilis       |
| 11     | k__Bacteria; p__Proteobacteria; c__Gammaproteobacteria; o__Aeromonadales; f__Aeromonadaceae; g__Aeromonas; s__hydrophila             |
| 10     | k__Bacteria; p__Bacteroidetes; c__Flavobacteria; o__Flavobacteriales; f__[Weeksellaceae]                                             |
| 13     | k__Bacteria; p__Firmicutes; c__Clostridia; o__Clostridiales; f__Clostridiaceae; g__Clostridium; s__butyricum                         |
| 12     | k__Bacteria; p__Proteobacteria; c__Gammaproteobacteria; o__Enterobacteriales; f__Enterobacteriaceae; g__Enterobacter                 |
| 15     | k__Bacteria; p__Proteobacteria; c__Betaproteobacteria; o__Burkholderiales; f__Comamonadaceae; g__Variovorax; s__paradoxus            |
| 14     | k__Bacteria; p__Bacteroidetes; c__[Saprospirae]; o__[Saprospirales]; f__Chitinophagaceae; g__; s__                                   |
| 17     | k__Bacteria; p__Proteobacteria; c__Betaproteobacteria; o__Burkholderiales; f__Comamonadaceae; g__Comamonas; s__                      |
| 16     | k__Bacteria; p__Firmicutes; c__Clostridia; o__Clostridiales; f__Clostridiaceae; g__Clostridium; s__                                  |
| 19     | k__Bacteria; p__Proteobacteria; c__Betaproteobacteria; o__Rhodocyclales; f__Rhodocyclaceae; g__Zoogloea; s__                         |
| 889    | k__Bacteria; p__Proteobacteria; c__Alphaproteobacteria; o__Rhizobiales; f__Rhizobiaceae; g__Agrobacterium; s__                       |
| 77     | k__Bacteria; p__Actinobacteria; c__Actinobacteria; o__Actinomycetales; f__Microbacteriaceae; g__Microbacterium                       |
| 75     | k__Bacteria; p__Actinobacteria; c__Actinobacteria; o__Actinomycetales; f__Nocardiodiaceae; g__Pimelobacter; s__                      |
| 79     | k__Bacteria; p__Proteobacteria; c__Gammaproteobacteria; o__Alteromonadales; f__Shewanellaceae; g__Shewanella; s__algae               |
| 698    | k__Bacteria; p__Firmicutes; c__Clostridia; o__Clostridiales; f__Clostridiaceae; g__Clostridium                                       |
| 8      | k__Bacteria; p__Bacteroidetes; c__Sphingobacteria; o__Sphingobacteriales; f__Sphingobacteriaceae; g__Sphingobacterium; s__multivorum |
| 122    | k__Bacteria; p__Bacteroidetes; c__Sphingobacteria; o__Sphingobacteriales; f__Sphingobacteriaceae                                     |

| OTU ID | taxonomy                                                                                                                              |
|--------|---------------------------------------------------------------------------------------------------------------------------------------|
| 316    | k__Bacteria; p__Proteobacteria; c__Deltaproteobacteria; o__Bdellovibrionales; f__Bdellovibrionaceae; g__Bdellovibrio; s__             |
| 785    | k__Bacteria; p__Proteobacteria; c__Gammaproteobacteria; o__Pseudomonadales; f__Moraxellaceae; g__Acinetobacter; s__rhizosphaerae      |
| 571    | k__Bacteria; p__Firmicutes; c__Clostridia; o__Clostridiales; f__Clostridiaceae; g__Clostridium                                        |
| 63     | k__Bacteria; p__Firmicutes; c__Clostridia; o__Clostridiales; f__Clostridiaceae; g__Clostridium; s__                                   |
| 64     | k__Bacteria; p__Proteobacteria; c__Alphaproteobacteria; o__Rhizobiales                                                                |
| 68     | k__Bacteria; p__Proteobacteria; c__Alphaproteobacteria; o__Rhizobiales; f__Rhizobiaceae                                               |
| 737    | k__Bacteria; p__Proteobacteria; c__Gammaproteobacteria; o__Enterobacteriales; f__Enterobacteriaceae                                   |
| 877    | k__Bacteria; p__Proteobacteria; c__Betaproteobacteria; o__Burkholderiales; f__Comamonadaceae; g__Variovorax; s__paradoxus             |
| 9      | k__Bacteria; p__Firmicutes; c__Clostridia; o__Clostridiales; f__Clostridiaceae; g__Clostridium                                        |
| 41     | k__Bacteria; p__Bacteroidetes                                                                                                         |
| 4      | k__Bacteria; p__Bacteroidetes; c__Flavobacteriia; o__Flavobacteriales; f__[Weeksellaceae]; g__Chryseobacterium; s__                   |
| 264    | k__Bacteria; p__Bacteroidetes; c__Flavobacteriia; o__Flavobacteriales; f__[Weeksellaceae]; g__Cloacibacterium; s__                    |
| 259    | k__Bacteria; p__Bacteroidetes; c__Flavobacteriia; o__Flavobacteriales; f__[Weeksellaceae]; g__Chryseobacterium; s__                   |
| 428    | k__Bacteria; p__Bacteroidetes; c__Sphingobacteriia; o__Sphingobacteriales; f__Sphingobacteriaceae; g__Sphingobacterium; s__multivorum |
| 914    | k__Bacteria; p__Proteobacteria; c__Betaproteobacteria; o__Burkholderiales; f__Comamonadaceae                                          |
| 422    | k__Bacteria; p__Bacteroidetes; c__Flavobacteriia; o__Flavobacteriales; f__[Weeksellaceae]                                             |
| 1184   | k__Bacteria; p__Firmicutes; c__Clostridia; o__Clostridiales; f__Clostridiaceae; g__Clostridium; s__butyricum                          |
| 153    | k__Bacteria; p__Proteobacteria; c__Alphaproteobacteria; o__Caulobacterales; f__Caulobacteraceae; g__Caulobacter; s__                  |
| 48     | k__Bacteria; p__Proteobacteria; c__Gammaproteobacteria; o__Oceanospirillales; f__Halomonadaceae; g__Halomonas                         |
| 46     | k__Bacteria; p__Bacteroidetes; c__Flavobacteriia; o__Flavobacteriales; f__[Weeksellaceae]; g__Cloacibacterium; s__                    |
| 42     | k__Bacteria; p__Proteobacteria; c__Gammaproteobacteria; o__Enterobacteriales; f__Enterobacteriaceae                                   |
| 43     | k__Bacteria; p__Proteobacteria; c__Gammaproteobacteria; o__Enterobacteriales; f__Enterobacteriaceae; g__Rahnella; s__aquatilis        |
| 5      | k__Bacteria; p__Bacteroidetes; c__Sphingobacteriia; o__Sphingobacteriales; f__Sphingobacteriaceae; g__Pedobacter; s__                 |

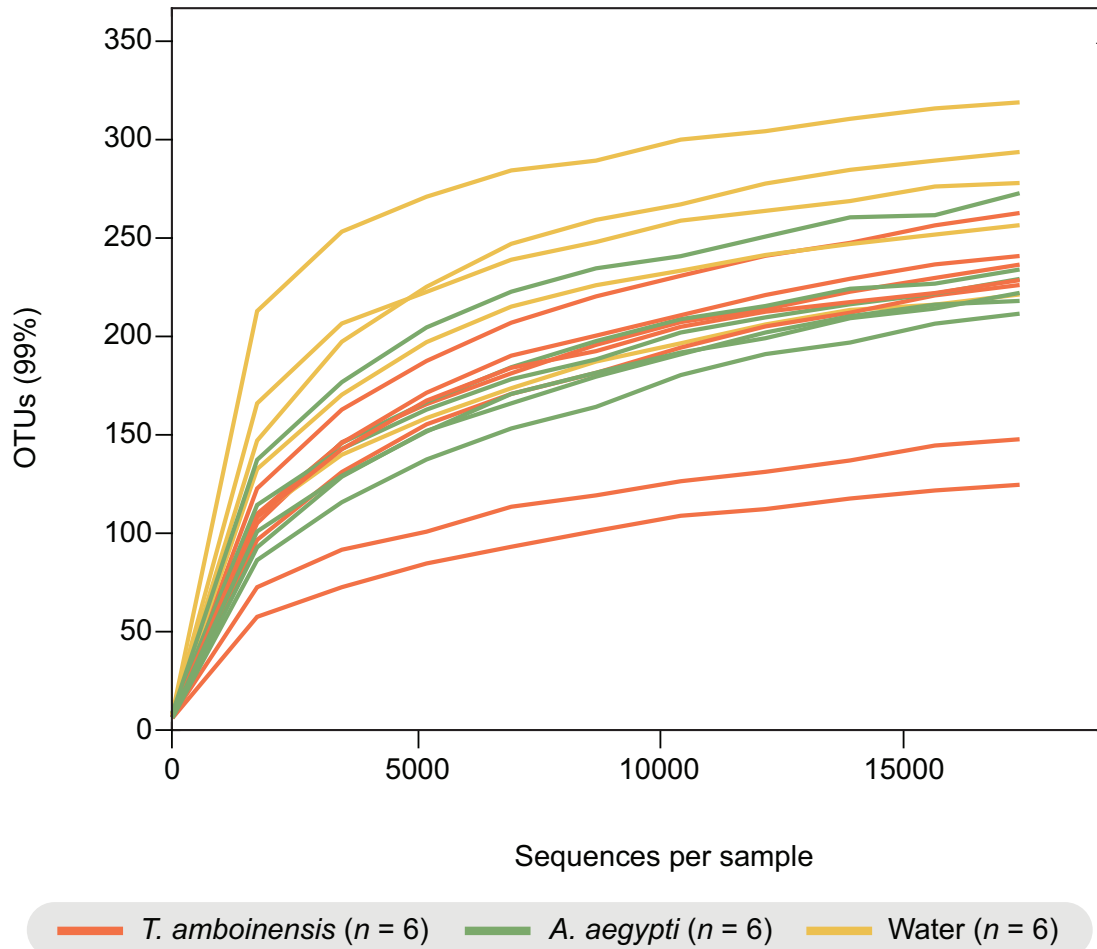

**Supplementary Figure 1.** Rarefaction data from Illumina sequencing experiment. Reads from six *T. amboinensis* (orange), *A. aegypti* (green), and water (yellow) libraries were sampled starting at 100 sequences per step and increased in increments of 50 until the total number of reads per sample was reached. Each step was sampled 10 times. Each line represents the smoothed mean across each increment for OTUs clustered at a sequence similarity threshold of 99%. Lines for each biological replicate are shown.

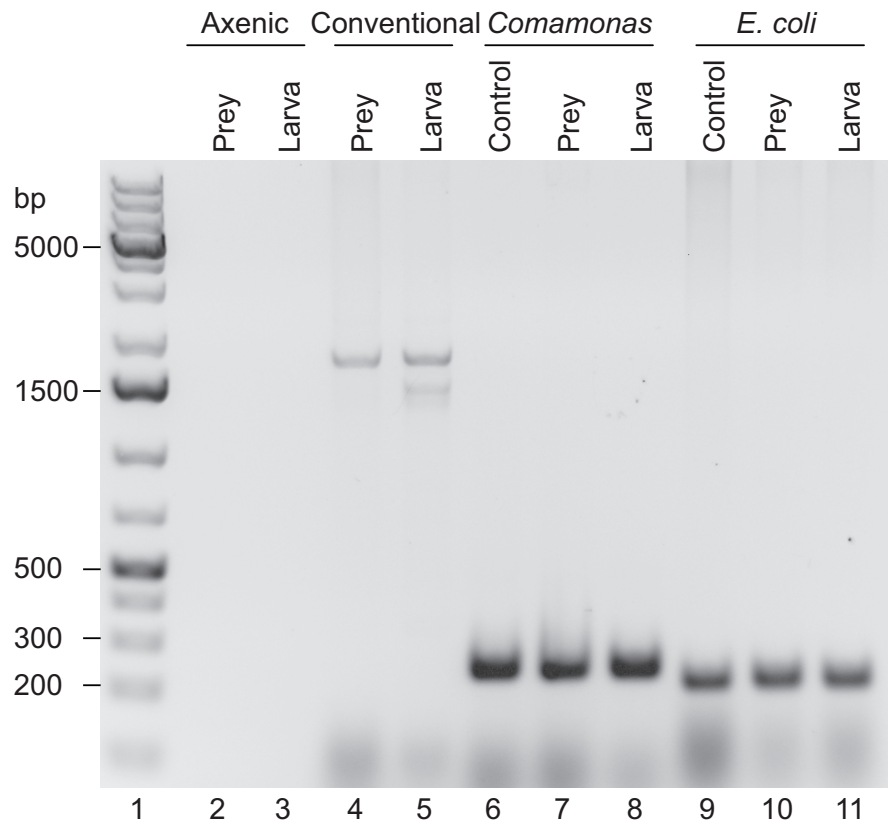

**Supplementary Figure 2.** Representative agarose gel showing colonization of axenic *T. amboinensis* larvae (L) by bacteria from conventional or gnotobiotic prey (P). For each treatment, DNA was isolated from individual larvae or pools and used as template for PCR analysis with universal or taxon-specific primers. Lane 1, molecular mass marker; Lanes 2-3, universal primers plus DNA from axenic first instars; Lanes 4-5, universal primers plus DNA from conventional first instars; Lanes 6-8, *Comamonas*-specific primers plus template from *Comamonas* (control) or gnotobiotic fourth instars. The same treatments are then shown for *E. coli* (Lanes 9-11). At least 10 individuals were examined for each treatment with all outcomes being identical to what is presented in the figure.

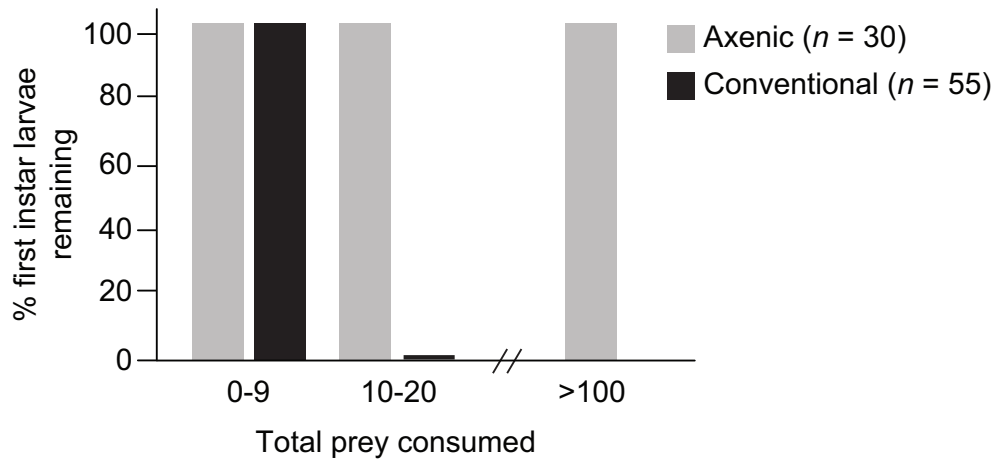

**Supplementary Figure 3.** The number of axenic or conventional first instar larvae remaining after consumption of a defined quantity of prey. All conventional larvae moulted to the second instar after consuming at least ten prey larvae. In contrast, all axenic larvae remained first instars even after consuming very large (>100) quantities of prey. A total of 85 (30 axenic and 55 conventional) larvae were assayed to produce the data presented.

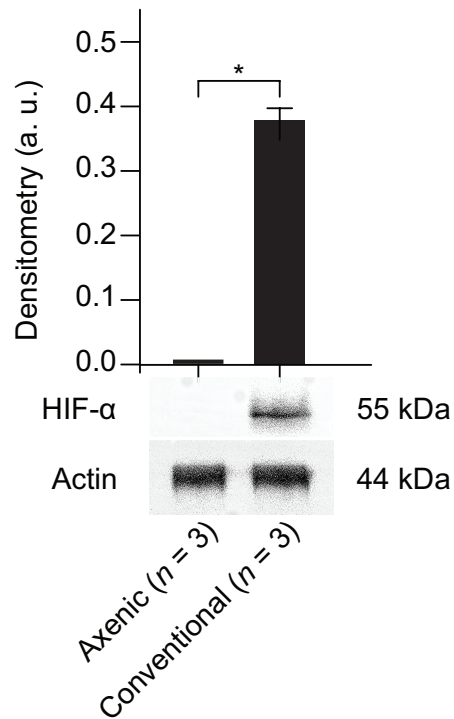

**Supplementary Figure 4.** Representative immunoblot of extracts from axenic and conventional first instars. Three pools of five larvae were collected for each treatment group at 18 h post egg hatching and probed with anti-HIF- $\alpha$  or anti-actin, which served as a loading control. Molecular masses of each protein are indicated to the right. The graph above the immunoblot shows mean density ( $\pm$  SE) in arbitrary units (a. u.) of the 55 kDa HIF- $\alpha$  splice variant relative to the actin loading control from three independently generated immunoblots. The asterisk (\*) indicates a significant difference between axenic and conventional larvae (Student's *t*-test,  $P < 0.0001$ ).
